# Supplementary material for: Iodine and alkali metal alkoxides: a simple and versatile catalytic system for fully alternating polyester synthesis from phthalic anhydride and epoxides
Source: Royal Society of Chemistry journal article supplement (doi:10.1039/d2py00411a), 2022-01-01
Supplement: d2py00411a1.pdf [file d2py00411a1.pdf]

–Supporting Information for the manuscript entitled–

**“Iodine and alkali metal alkoxides: A simple and versatile catalyst system for fully alternating polyesters synthesis from phthalic anhydride and epoxides”**

Anjaneyulu Kummari,<sup>a</sup> Sreenath Pappuru,<sup>a</sup> Sourav Singha Roy<sup>a</sup> and Debashis Chakraborty\*<sup>a</sup>

<sup>a</sup> Department of Chemistry, Indian Institute of Technology Madras, Chennai 600 036, Tamil Nadu, India.

Corresponding author: [dchakraborty@iitm.ac.in](mailto:dchakraborty@iitm.ac.in)

**Figure S1.**  $^1\text{H}$  NMR spectrum ( $\text{CDCl}_3$ , 400 MHz, 298K) of P(PA-*alt*-CHO) copolymer derived by the action of  $\text{I}_2$  and *t*BuOK ( $\text{I}_2/\text{tBuOK}/\text{PA}/\text{CHO} = 1:1:100:400$ ), (entry15, Table 1).

**Figure S2.**  $^{13}\text{C}$  NMR spectrum ( $\text{CDCl}_3$ , 400 MHz, 298K) of P(PA-*alt*-CHO) copolymer derived by the action of  $\text{I}_2$  and *t*BuOK ( $\text{I}_2/\text{tBuOK}/\text{PA}/\text{CHO} = 1:1:100:400$ ), (entry15, Table 1).

**Figure S3.**  $^1\text{H}$  NMR spectrum ( $\text{CDCl}_3$ , 400 MHz, 298K) of P(PA-*alt-t*BGE) copolymer derived by the action of  $\text{I}_2$  and *t*BuOK ( $\text{I}_2/\text{tBuOK}/\text{PA}/\text{tBGE} = 1:1:100:400$ ), (entry 1, Table 2).

**Figure S4.**  $^{13}\text{C}$  NMR spectrum ( $\text{CDCl}_3$ , 400 MHz, 298K) of P(PA-*alt-t*BGE) copolymer derived by the action of  $\text{I}_2$  and *t*BuOK ( $\text{I}_2/\text{tBuOK}/\text{PA}/\text{tBGE} = 1:1:100:400$ ), (entry 1, Table 2).

**Figure S5.**  $^1\text{H}$  NMR spectrum ( $\text{CDCl}_3$ , 400 MHz, 298K) of P(PA-*alt*-PGE) copolymer derived by the action of  $\text{I}_2$  and *t*BuOK ( $\text{I}_2/\text{tBuOK}/\text{PA}/\text{PGE} = 1:1:100:400$ ), (entry 4, Table 2).

**Figure S6.**  $^{13}\text{C}$  NMR spectrum ( $\text{CDCl}_3$ , 400 MHz, 298K) of P(PA-*alt*-PGE) copolymer derived by the action of  $\text{I}_2$  and *t*BuOK ( $\text{I}_2/\text{tBuOK}/\text{PA}/\text{PGE} = 1:1:100:400$ ), (entry 4, Table 2).

**Figure S7.**  $^1\text{H}$  NMR spectrum ( $\text{CDCl}_3$ , 400 MHz, 298K) of P(PA-*alt*-AGE) copolymer derived by the action of  $\text{I}_2$  and *t*BuOK ( $\text{I}_2/\text{tBuOK}/\text{PA}/\text{AGE} = 2:1:100:400$ ), (entry7, Table 2).

**Figure S8.**  $^{13}\text{C}$  NMR spectrum ( $\text{CDCl}_3$ , 400 MHz, 298K) of P(PA-*alt*-AGE) copolymer derived by the action of  $\text{I}_2$  and *t*BuOK ( $\text{I}_2/\text{tBuOK}/\text{PA}/\text{AGE} = 1:1:100:400$ ), (entry7, Table 2).

**Figure S9.**  $^1\text{H}$  NMR spectrum ( $\text{CDCl}_3$ , 400 MHz, 298K) of P(PA-*alt*-PO) copolymer derived by the action of  $\text{I}_2$  and *t*BuOK ( $\text{I}_2/\text{tBuOK}/\text{PA}/\text{PO} = 1:1:100:400$ ), (entry 13, Table 2).

**Figure S10.**  $^{13}\text{C}$  NMR spectrum ( $\text{CDCl}_3$ , 400 MHz, 298K) of P(PA-*alt*-PO) copolymer derived by the action of  $\text{I}_2$  and *t*BuOK ( $\text{I}_2/\text{tBuOK}/\text{PA}/\text{PO} = 1:1:100:400$ ), (entry 13, Table 2).

**Figure S11.**  $^1\text{H}$  NMR spectrum ( $\text{CDCl}_3$ , 400 MHz, 298K) of P(PA-*alt*-SO) copolymer derived by the action of  $\text{I}_2$  and *t*BuOK ( $\text{I}_2/\text{tBuOK}/\text{PA}/\text{SO} = 1:1:100:400$ ), (entry 10, Table 2).

**Figure S12.**  $^{13}\text{C}$  NMR spectrum ( $\text{CDCl}_3$ , 400 MHz, 298K) of P(PA-*alt*-SO) copolymer derived by the action of  $\text{I}_2$  and *t*BuOK ( $\text{I}_2/\text{tBuOK}/\text{PA}/\text{SO} = 1:1:100:400$ ), (entry 10, Table 2).

**Figure S13.**  $^1\text{H}$  NMR spectrum ( $\text{CDCl}_3$ , 400 MHz, 298K) of P(PA-*alt*-CHO) copolymer derived by the action of  $\text{I}_2$  and *t*BuOK ( $\text{I}_2/\text{tBuOK}/\text{PA}/\text{PO} = 1:1:100:400$ ), at 70 °C. (entry 10, Table 2).

**Figure S14.** GPC trace of purified product P(PA-*alt*-CHO) copolymer derived by the action of  $\text{I}_2$  and  $\text{CH}_3\text{OK}$  ( $\text{I}_2/\text{CH}_3\text{OK}/\text{PA}/\text{CHO} = 1:1:100:300$ ), (entry 3, Table 1).

**Figure S15.** GPC trace of purified product P(PA-*alt*-CHO) copolymer derived by the action of  $\text{I}_2$  and *t*BuOLi ( $\text{I}_2/\text{tBuOLi}/\text{PA}/\text{CHO} = 1:1:100:400$ ), (entry 6, Table 1).

**Figure S16.** GPC trace of purified product P(PA-*alt*-CHO) copolymer derived by the action of  $\text{I}_2$  and *t*BuONa ( $\text{I}_2/\text{tBuONa}/\text{PA}/\text{CHO} = 1:1:100:400$ ), (entry 7, Table 1).

**Figure S17.** GPC trace of purified product P(PA-*alt*-CHO) copolymer derived by the action of  $\text{I}_2$  and  $\text{CH}_3\text{OK}$  ( $\text{I}_2/\text{CH}_3\text{OK}/\text{PA}/\text{CHO} = 1:1:100:400$ ), (entry 8, Table 1).

**Figure S18.** GPC trace of purified product P(PA-*alt*-CHO) copolymer derived by the action of  $\text{I}_2$  and *i*PrOK ( $\text{I}_2/\text{iPrOK}/\text{PA}/\text{CHO} = 1:1:100:400$ ), (entry 12, Table 1).

**Figure S19.** GPC trace of purified product P(PA-*alt*-CHO) copolymer derived by the action of I<sub>2</sub> and *t*BuOLi (I<sub>2</sub>/*t*BuOLi/PA/CHO = 1:1:100:400), (entry 13, Table 1).

**Figure S20.** GPC trace of purified product of P(PA-*alt*-CHO) copolymer derived by the action of I<sub>2</sub> and *t*BuONa (I<sub>2</sub>/*t*BuONa/PA/CHO = 1:1:100:400), (entry 14, Table 1).

**Figure S21.** GPC trace of purified product P(PA-*alt*-CHO) copolymer derived by the action of I<sub>2</sub> and *t*BuOK (I<sub>2</sub>/*t*BuOK/PA/CHO = 1:1:100:400), (entry 15, Table 1).

**Figure S22.** GPC trace of purified product P(PA-*alt*-CHO) copolymer derived by the action of I<sub>2</sub> and *i*PrONa (I<sub>2</sub>/*i*PrONa /PA/CHO = 1:1:100:400), (entry 20, Table 1).

**Figure S23.** GPC trace of purified product P(PA-*alt*-CHO) copolymer derived by the action of I<sub>2</sub> and CH<sub>3</sub>OK (I<sub>2</sub>/CH<sub>3</sub>OK/PA/CHO = 1:1:100:300), (entry 24, Table 1).

**Figure S24.** GPC trace of purified product P(PA-*alt*- *t*BGE) copolymer derived by the action of I<sub>2</sub> and *t*BuOK (I<sub>2</sub>/*t*BuOK/PA/*t*BGE = 1:1:100:400), (entry 1, Table 2).

**Figure S25.** GPC trace of purified product P(PA-*alt*- *t*BGE) copolymer derived by the action of I<sub>2</sub> and *t*BuOK (I<sub>2</sub>/*t*BuOK /PA/*t*BGE = 1:1:250:800), (entry 2, Table 2).

**Figure S26.** GPC trace of purified product P(PA-*alt*- *t*BGE) copolymer derived by the action of I<sub>2</sub> and *t*BuOK (I<sub>2</sub>/*t*BuOK /PA/*t*BGE = 1:1:500:1200), (entry 3, Table 2).

**Figure S27.** GPC trace of purified product P(PA-*alt*-PGE) copolymer derived by the action of I<sub>2</sub> and *t*BuOK (I<sub>2</sub>/*t*BuOK /PA/PGE = 1:1:100:400), (entry 4, Table 2).

**Figure S28.** GPC trace of purified product P(PA-*alt*-PGE) copolymer derived by the action of I<sub>2</sub> and *t*BuOK (I<sub>2</sub>/*t*BuOK /PA/PGE = 1:1:250:800), (entry 5, Table 2).

**Figure S29.** GPC trace of purified product of P(PA-*alt*-PGE) copolymer derived by the action of I<sub>2</sub> and *t*BuOK (I<sub>2</sub>/*t*BuOK/PA/PGE = 1:1:500:1200), (entry 6, Table 2).

**Figure S30.** GPC trace of purified product P(PA-*alt*-AGE) copolymer derived by the action of I<sub>2</sub> and *t*BuOK (I<sub>2</sub>/*t*BuOK/PA/AGE = 1:1:100:400), (entry 7, Table 2).

**Figure S31.** GPC trace of purified product P(PA-*alt*-AGE) copolymer derived by the action of I<sub>2</sub> and *t*BuOK (I<sub>2</sub>/*t*BuOK/PA/AGE = 1:1:250:800), (entry 8, Table 2).

**Figure S32.** GPC trace of purified product P(PA-*alt*-AGE) copolymer derived by the action of I<sub>2</sub> and *t*BuOK (I<sub>2</sub>/*t*BuOK/PA/AGE = 1:1:500:1200), (entry 9, Table 2).

**Figure S33.** GPC trace of purified product P(PA-*alt*-SO) copolymer derived by the action of I<sub>2</sub> and *t*BuOK (I<sub>2</sub>/*t*BuOK/PA/SO = 1:1:100:400), (entry 10, Table 2).

**Figure S34.** GPC trace of purified product P(PA-*alt*-SO) copolymer derived by the action of I<sub>2</sub> and *t*BuOK (I<sub>2</sub>/*t*BuOK/PA/SO = 1:1:250:800), Table (entry 11, Table 2).

**Figure S35.** GPC trace of purified product P(PA-*alt*-SO) copolymer derived by the action of I<sub>2</sub> and *t*BuOK (I<sub>2</sub>/*t*BuOK/PA/SO = 1:1:500:1200), (entry 12, Table 2).

**Figure S36.** GPC trace of purified product P(PA-*alt*-PO) copolymer derived by the action of I<sub>2</sub> and *t*BuOK (I<sub>2</sub>/*t*BuOK/PA/PO = 1:1:100:400), (entry 13, Table 2).

**Figure S37.** GPC trace of purified product P(PA-*alt*-PO) copolymer derived by the action of I<sub>2</sub> and *t*BuOK (I<sub>2</sub>/*t*BuOK/PA/PO = 1:1:250:800), (entry 14, Table 2).

**Figure S38.** GPC trace of purified product P(PA-*alt*-PO) copolymer derived by the action of I<sub>2</sub> and *t*BuOK (I<sub>2</sub>/*t*BuOK/PA/PO = 1:1:500:1200), (entry 15, Table 2).

**Figure S39.** Regiostructures of polyesters: tail-to-tail (TT), head-to-tail (HT), and head-to-head (HH) junctions, P(PO-*alt*-PA)polymer.

**Figure S40.** MALDI-TOF MS spectrum of the short P(PA-*alt*-AGE) precursor synthesized by the catalysis of I<sub>2</sub>/*t*BuOK.

**Figure S41.** MALDI-TOF MS spectrum of the short P(PA-*alt*-tBGE) precursor synthesized by the catalysis of I<sub>2</sub>/*t*BuOK.

**Figure S42.** Overlap of <sup>1</sup>H NMR monitoring of copolymerization PA/CHO and catalysed by I<sub>2</sub>/*t*BuOK catalyst system with the ratio I<sub>2</sub>/*t*BuOK/NA/CHO = 1:1:100:400 (Entry 3 to 6, Table 4.2) with respect 0.5 h, 1 h, 2 h, and 2.5 h of reaction time.

**Figure S43.** TGA and derivative thermogravimetry (DTG) curves of of P(PA-*alt*-AGE) copolymer derived by the action of I<sub>2</sub>/*t*BuOK (I<sub>2</sub>/*t*BuOK/PA/AGE = 1:1:100:400), (entry 7, Table 4.3).

**Figure S44.** TGA and derivative thermogravimetry (DTG) curves of P(PA-*alt*-CHO) copolymer derived by the action of I<sub>2</sub>/*t*BuOK (I<sub>2</sub>/*t*BuOK/PA/CHO = 1:1:500:1200), (entry 26 Table 4.1).

**Table S1.** ROAC of phthalic anhydride with cyclohexane oxide at various temperature and time.

## EXPERIMENTAL DETAILS

Monomers and catalysts used for copolymerization were purchased from Aldrich. CHO, *t*BGE, PO, PGE, AGE and SO were dried over CaH<sub>2</sub> overnight, vacuum-distilled, and stored in the glovebox for further use. PA was sublimed twice prior to use. The deuterated solvent for NMR studies *i.e.* CDCl<sub>3</sub> was acquired from Aldrich and purified by distilling over calcium hydride then stored in a glove box. The common reagents, common solvents were acquired locally and purified by usual methods. Toluene and THF were dried by refluxing over sodium/benzophenone for at least 24 h and freshly distilled prior to use. All manipulations for the preparation of polyesters were carried out using either standard Schlenk techniques or glovebox techniques under a dry argon atmosphere. All <sup>1</sup>H and <sup>13</sup>C NMR were recorded on a Bruker Avance 400 MHz or 500 MHz spectrometers with chemical shifts given in parts per million (ppm) using residual solvent peak at 7.26 ppm as reference in the case of CDCl<sub>3</sub>. MALDI-TOF MS spectra were recorded on a Bruker Daltonics instrument using trans-2-[3-(4-*t*-butyl-phenyl)-2-methyl-2-propenylidene] malononitrile (DCTB) as the matrix in THF at a loading of 1:5 with potassium trifluoroacetate as ionizing agent. Molecular weights ( $M_n$  and  $M_w$ ) and the MWDs ( $M_w/M_n$ ) of polymer samples were determined by GPC instrument with Waters 510 pump and Waters 410 or 2414 differential refractometer as the detector. Three columns, namely WATERS STRYGEL-HR5, STRYGEL-HR4 and STRYGEL-HR3, each of dimensions (7.8 × 300 mm), were connected in series. Measurements were done in THF at 27 °C. Number average molecular weights ( $M_n$ ) and MWDs ( $M_w/M_n$ ) of polymers were measured relative to polystyrene standards.

### **General procedure for the ring-opening copolymerization of PA and different epoxides under neat condition using I<sub>2</sub> and *t*BuOK**

Polymerizations were performed in a dry Schlenk tube or pressure tube using an outside heating bath. The vial was charged with a predetermined amount of molecular iodine (0.05 mmol, 1 equiv), potassium *tert*-butoxide (0.05 mmol, 1 equiv), epoxide (20 mmol, 400 equiv) and anhydride (5 mmol, 100 equiv), which were kept stirring for 5 min at room temperature in an argon filled glove box. The Schlenk tube or pressure tube was sealed, taken out of the glove box, and then immersed in the heating bath under the determined temperature, and stirred over the desired period of time. After a desired period, the reaction tube was removed from the heating bath and a 0.2 mL of crude sample was taken from the reaction mixture and prepared for <sup>1</sup>H NMR analysis. Then the mixture was diluted with dichloromethane and precipitated into 10 fold excess of cold methanol or ethanol or hexane, filtered, washed with methanol or hexane to remove the unreacted monomer and dried in a vacuum at room temperature to a constant weight. The final copolymers were analysed by <sup>1</sup>H and <sup>13</sup>C NMR, GPC, MALDI-TOF MS, DSC and TGA experiments.

### **General procedure for the ring-opening copolymerization of PA and cyclohexene oxide in toluene using I<sub>2</sub> and *t*BuOK**

Polymerization was performed in a dry schlenk tube or pressure tube using an external heating bath. The reaction tube was charged with 5 mL of dry toluene, iodine (12.69mg, 0.05 mmol, 1 equiv), potassium *tert*-butoxide (5.61mg, 0.05 mmol, 1 equiv), dibromomethane (8.69mg, 0.05 mmol, 1 equiv), epoxide (5 mmol, 100 equiv) and phthalic anhydride (5 mmol, 100 equiv), which were kept stirring for 5 to 10 min at room temperature in an argon filled glove box. The schlenk tube or pressure tube was sealed, taken out of the glove box, and then immersed in the heating bath at 90°C and stirred over the desired period of time. After a desired period, the reaction tube was removed from the heat heating bath and cooled to room temperature. The crude reaction product was analysed by <sup>1</sup>H NMR to see the conversion.

## In-situ studies for *tert*-butyl hypoiodite (*t*BuOI) and other alkyl hypoiodites synthesis:

According to previous literature method, *tert*-butyl hypoiodite (*t*BuOI) was prepared in-situ by the reaction of *tert*-butyl hypochlorite (*t*BuOCl) with NaI in 1:1 stoichiometric amount.<sup>1</sup> The starting reagent *t*BuOCl was also synthesized quantitatively from previous method.<sup>2</sup> The reaction of I<sub>2</sub> and *t*BuOK in THF at 70 °C gave *tert*-butyl hypoiodite (*t*BuOI) and KI. The aliquot was analysed by <sup>1</sup>H NMR and *tert*-butyl signal of *t*BuOI along with solvated THF signals were noticed (Figure S5a). After removal of THF by 6h vacuum the <sup>1</sup>H NMR analysis of obtained powder showed multiple signals indicating the decomposition of *t*BuOI product (Figure S5b). Hence, the in-situ formed *t*BuOI remains more stable in THF solvent. In the case of other alkyl hypoiodites we are not succeeded in in-situ <sup>1</sup>H NMR analysis. Because of high sensitivity to air and moisture the other alkyl hypoiodites (eg, *i*PrOI and MeOI) are decomposing while preparing NMR sample.

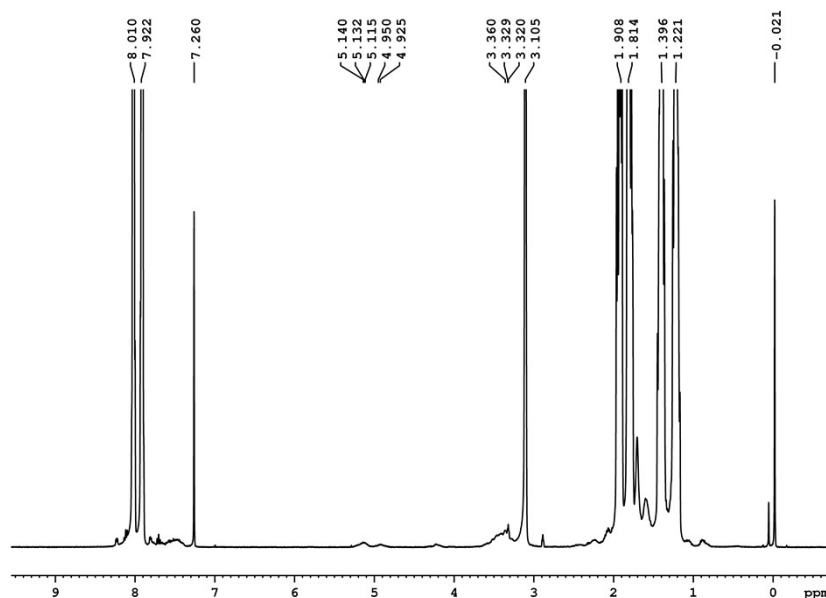

**Figure S1** <sup>1</sup>H NMR spectrum (CDCl<sub>3</sub>, 400 MHz, 298K) of crude product derived by the action of LiI (LiI/PA/CHO = 1:100:400) at 90 °C, 12h.

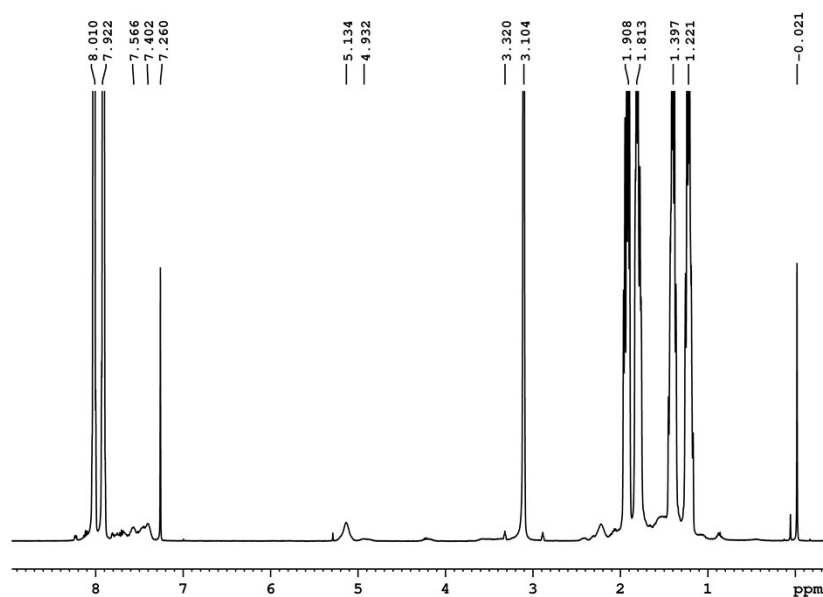

**Figure S2**  $^1\text{H}$  NMR spectrum ( $\text{CDCl}_3$ , 400 MHz, 298K) of crude product derived by the action of NaI (NaI/PA/CHO = 1:100:400) at 90 °C, 12h.

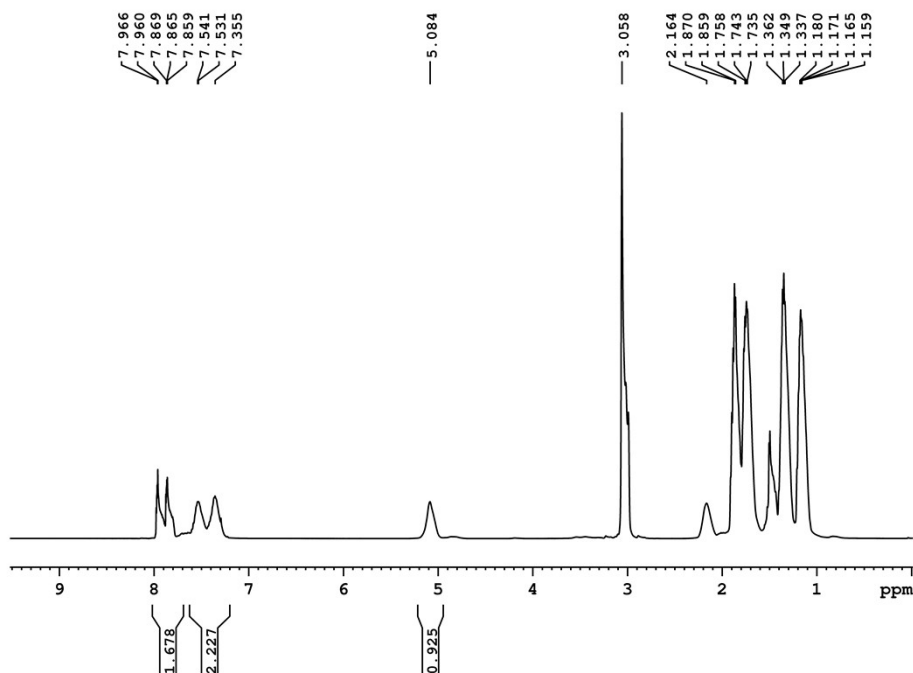

**Figure S3**  $^1\text{H}$  NMR spectrum ( $\text{CDCl}_3$ , 400 MHz, 298K) of crude product derived by the action of *t*BuOK (*t*BuOK/PA/CHO = 1:100:400) (entry 18, Table 1).



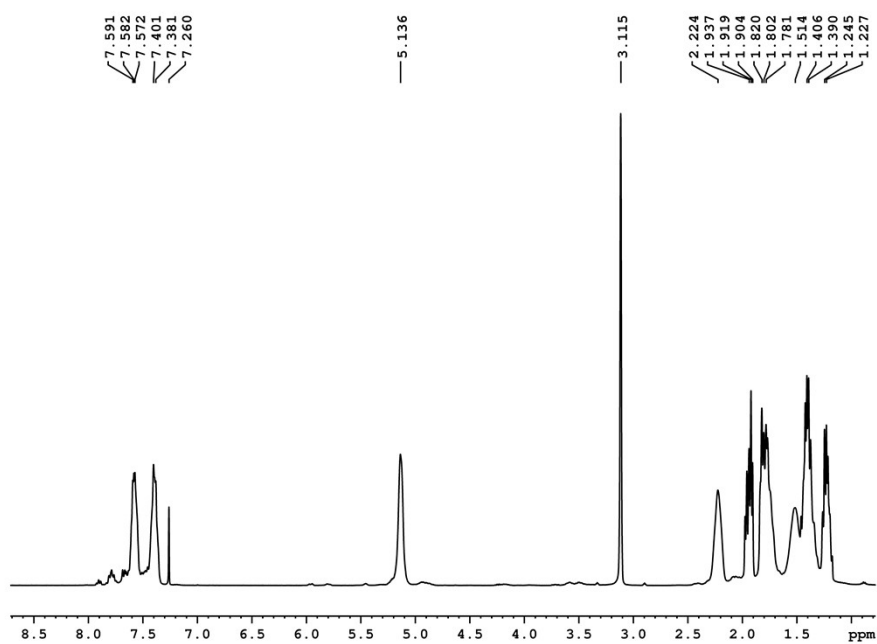

**Figure S4**  $^1\text{H}$  NMR spectrum ( $\text{CDCl}_3$ , 400 MHz, 298K) of crude product, P(PA-*alt*-CHO) derived by the action of KI+NaI+*t*BuOCl (KI/NaI/*t*BuOCl/PA/CHO = 1:1:1:100:400), (entry19, Table 1).

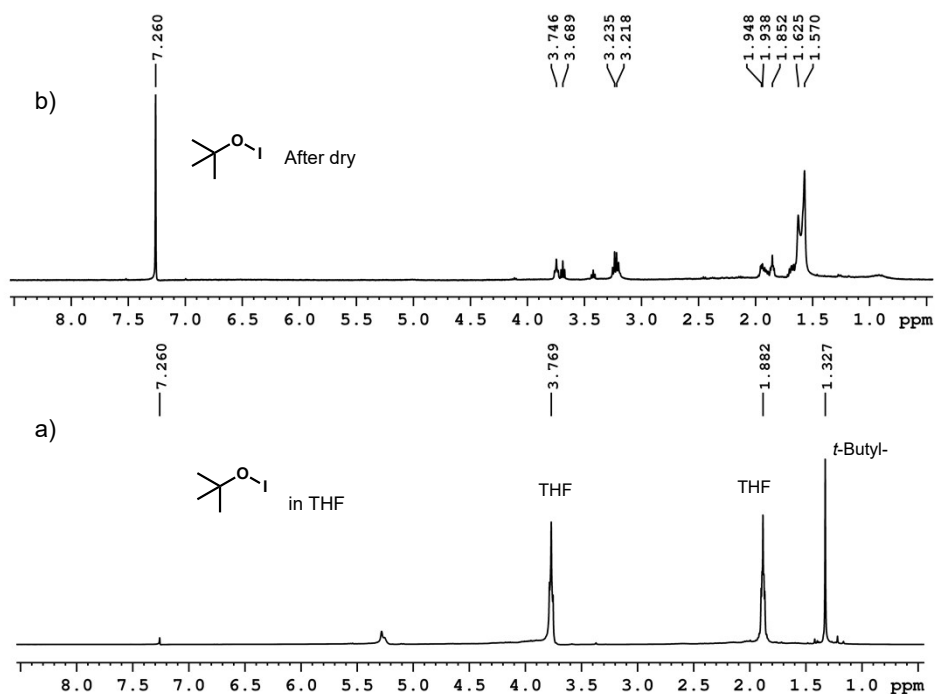

**Figure S5** a)  $^1\text{H}$  NMR spectrum ( $\text{CDCl}_3$ , 400 MHz, 298K) of THF aliquot from the in-situ reaction of *t*BuOK and  $\text{I}_2$  (1:1) in THF at 70 °C, 6h. b) After removal of THF by 6h vacuum.

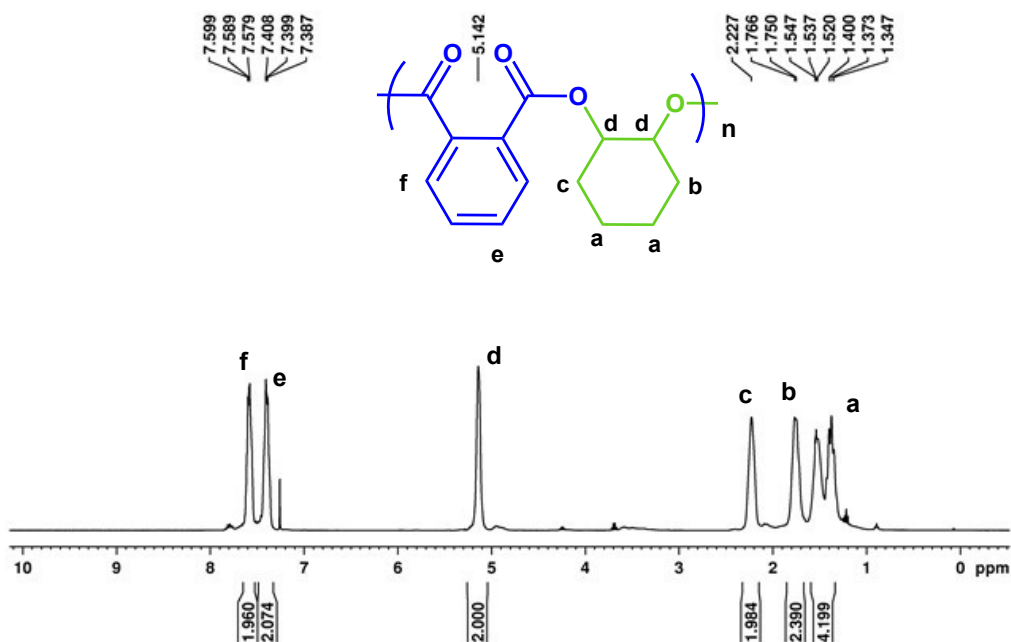

**Figure S6**  $^1\text{H}$  NMR spectrum ( $\text{CDCl}_3$ , 400 MHz, 298K) of purified P(PA-*alt*-CHO) copolymer derived by the action of  $\text{I}_2$  and *t*BuOK ( $\text{I}_2/\text{tBuOK}/\text{PA}/\text{CHO} = 1:1:100:400$ ), (entry15, Table 1).

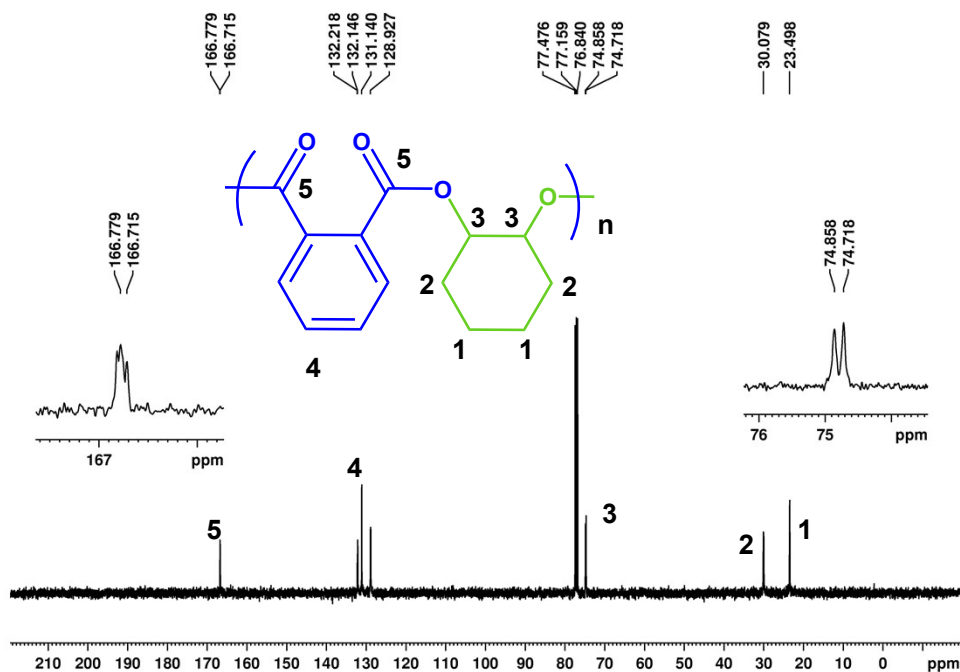

**Figure S7**  $^{13}\text{C}$  NMR spectrum ( $\text{CDCl}_3$ , 400 MHz, 298K) of P(PA-*alt*-CHO) copolymer derived by the action of  $\text{I}_2$  and *t*BuOK ( $\text{I}_2/\text{tBuOK}/\text{PA}/\text{tBGE} = 1:1:100:400$ ), (entry15, Table 1).

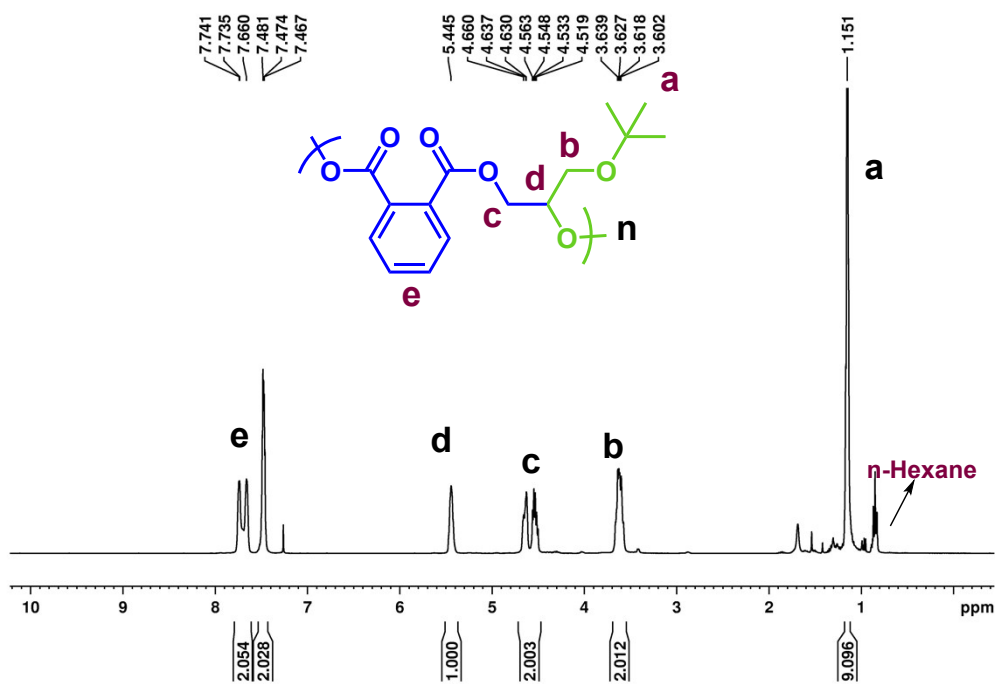

**Figure S8**  $^1\text{H}$  NMR spectrum ( $\text{CDCl}_3$ , 400 MHz, 298K) of P(PA-*alt*-tBGE) copolymer derived by the action of  $\text{I}_2$  and *t*BuOK ( $\text{I}_2/\text{tBuOK}/\text{PA}/\text{tBGE} = 1:1:100:400$ ), (entry 1, Table 2).

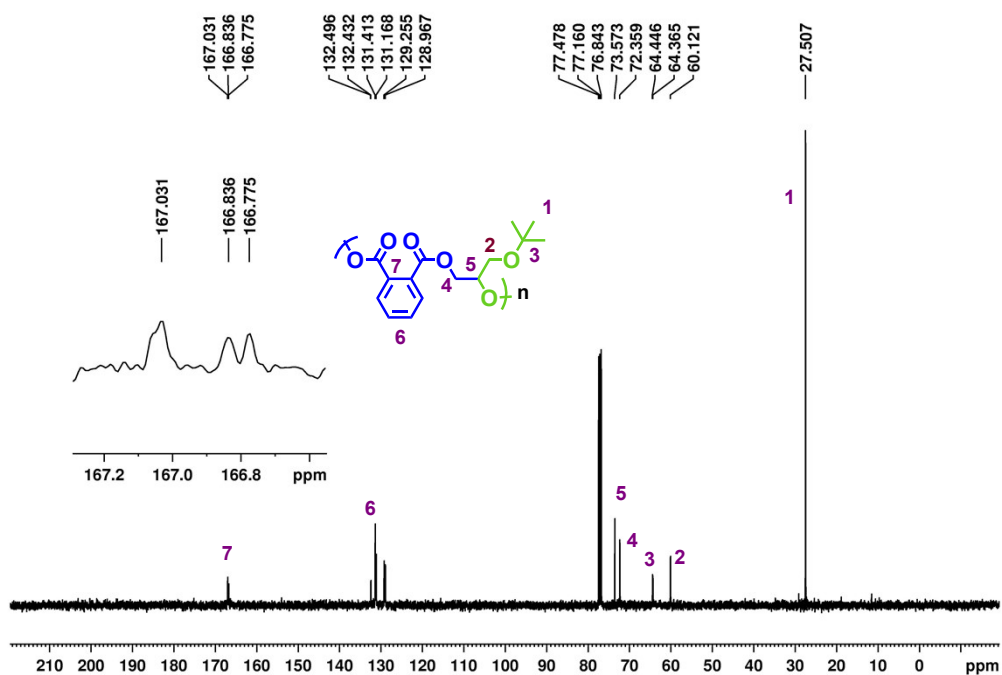

**Figure S9**  $^{13}\text{C}$  NMR spectrum ( $\text{CDCl}_3$ , 400 MHz, 298K) of P(PA-*alt*-tBGE) copolymer derived by the action of  $\text{I}_2$  and *t*BuOK ( $\text{I}_2/\text{tBuOK}/\text{PA}/\text{tBGE} = 1:1:100:400$ ), (entry 1, Table 2).

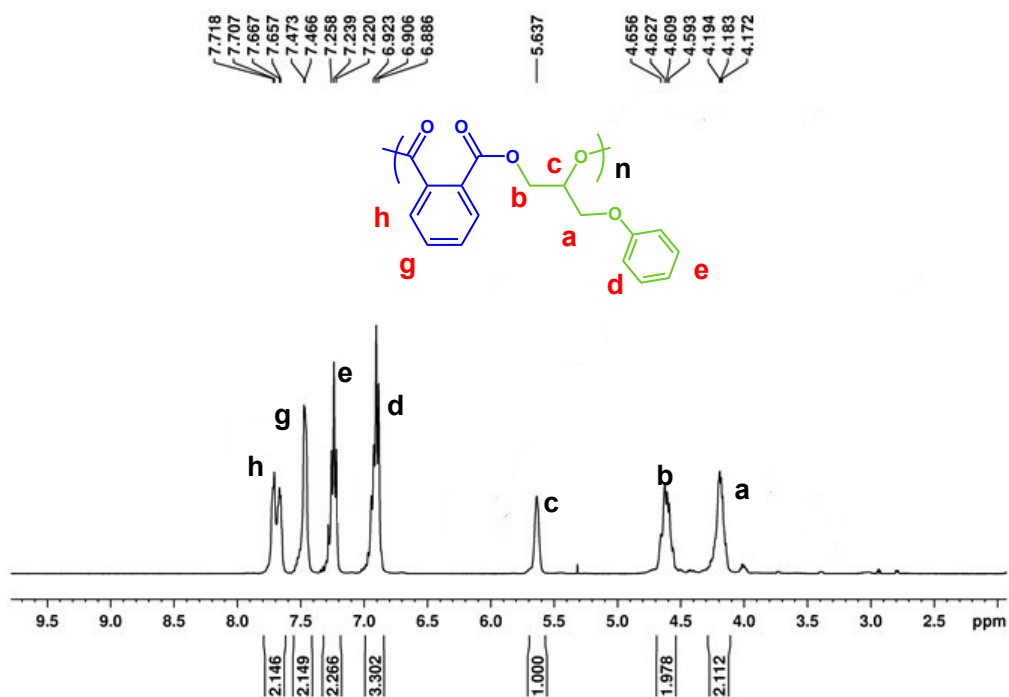

**Figure S10** <sup>1</sup>H NMR spectrum (CDCl<sub>3</sub>, 400 MHz, 298K) of P(PA-*alt*-PGE) copolymer derived by the action of I<sub>2</sub> and *t*BuOK (I<sub>2</sub>/*t*BuOK/PA/PGE = 1:1:100:400), (entry 4, Table 2).

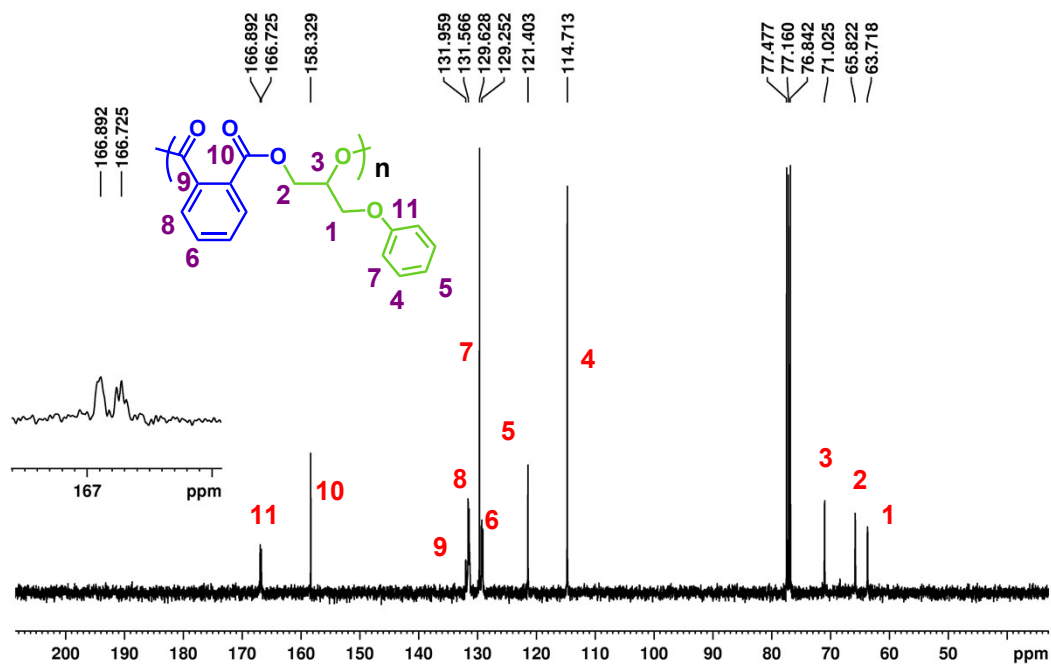

**Figure S11** <sup>13</sup>C NMR spectrum (CDCl<sub>3</sub>, 400 MHz, 298K) of P(PA-*alt*-PGE) copolymer derived by the action of I<sub>2</sub> and *t*BuOK (I<sub>2</sub>/*t*BuOK/PA/PGE = 1:1:100:400), (entry 4, Table 2).

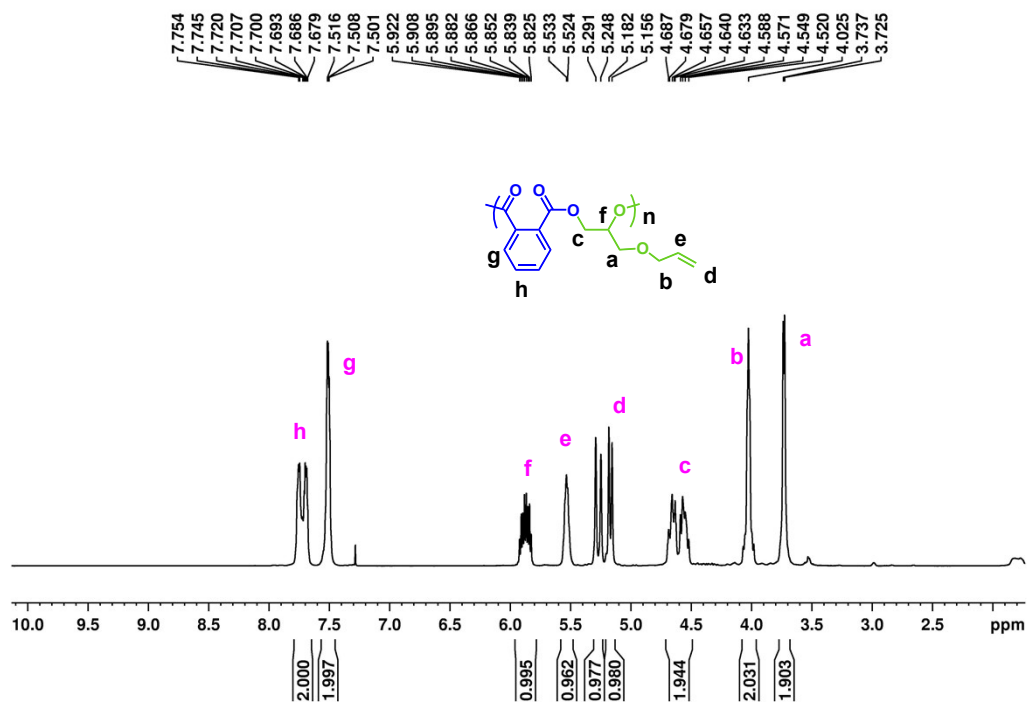

**Figure S12**  $^1\text{H}$  NMR spectrum ( $\text{CDCl}_3$ , 400 MHz, 298K) of P(PA-*alt*-AGE) copolymer derived by the action of  $\text{I}_2$  and *t*BuOK ( $\text{I}_2/\text{tBuOK}/\text{PA}/\text{AGE} = 2:1:100:400$ ), (entry7, Table 2).

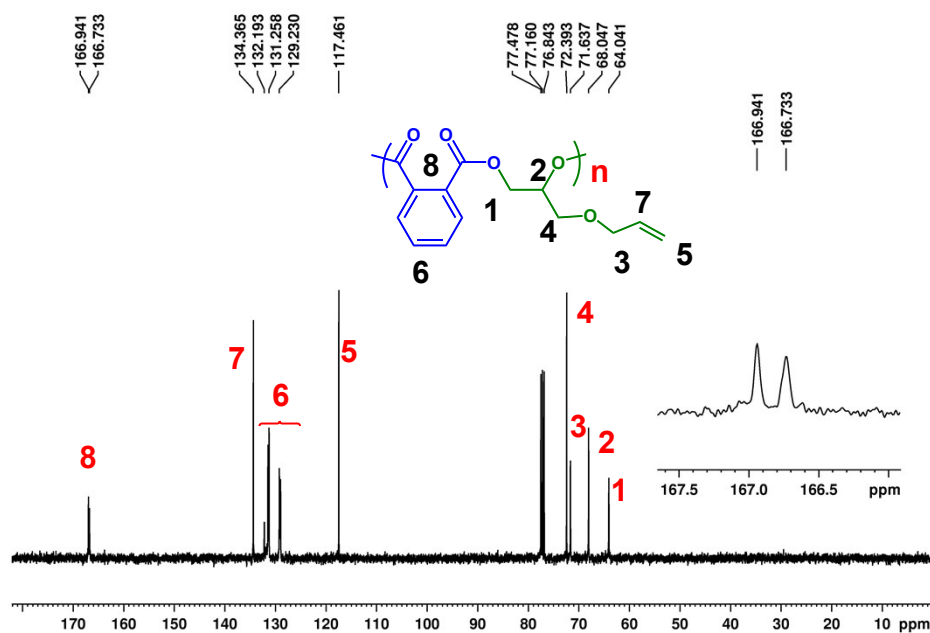

**Figure S13**  $^{13}\text{C}$  NMR spectrum ( $\text{CDCl}_3$ , 400 MHz, 298K) of P(PA-*alt*-AGE) copolymer derived by the action of  $\text{I}_2$  and *t*BuOK ( $\text{I}_2/\text{tBuOK}/\text{PA}/\text{AGE} = 1:1:100:400$ ), (entry7, Table 2).

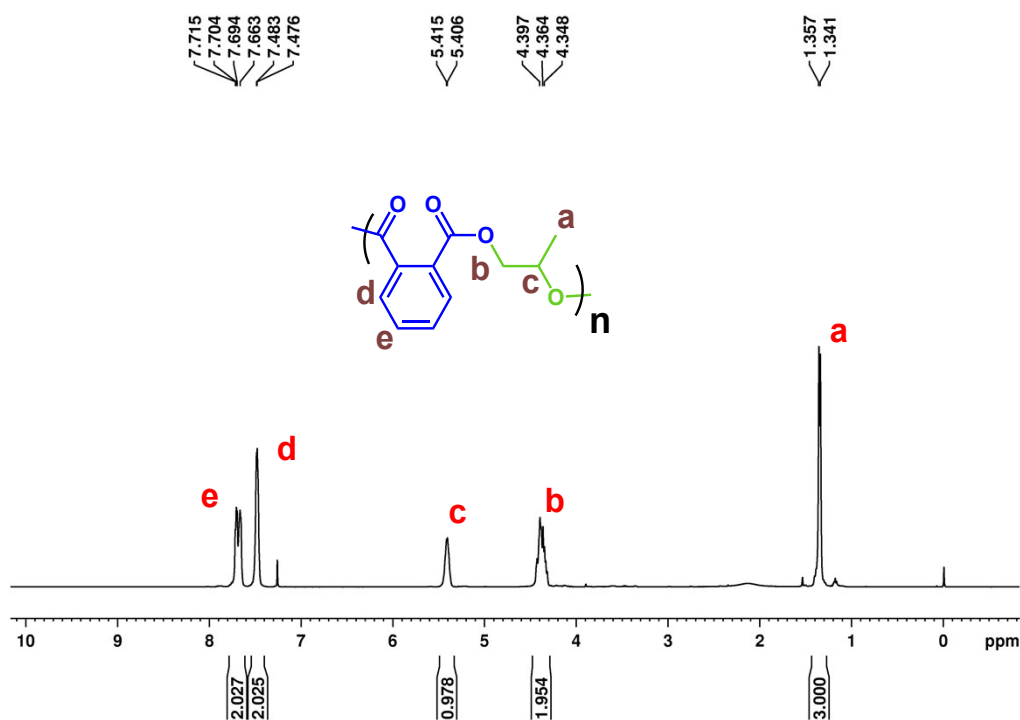

**Figure S14**  $^1\text{H}$  NMR spectrum ( $\text{CDCl}_3$ , 400 MHz, 298K) of P(PA-*alt*-PO) copolymer derived by the action of  $\text{I}_2$  and *t*BuOK ( $\text{I}_2/\text{tBuOK}/\text{PA}/\text{PO} = 1:1:100:400$ ), (entry 13, Table 2).

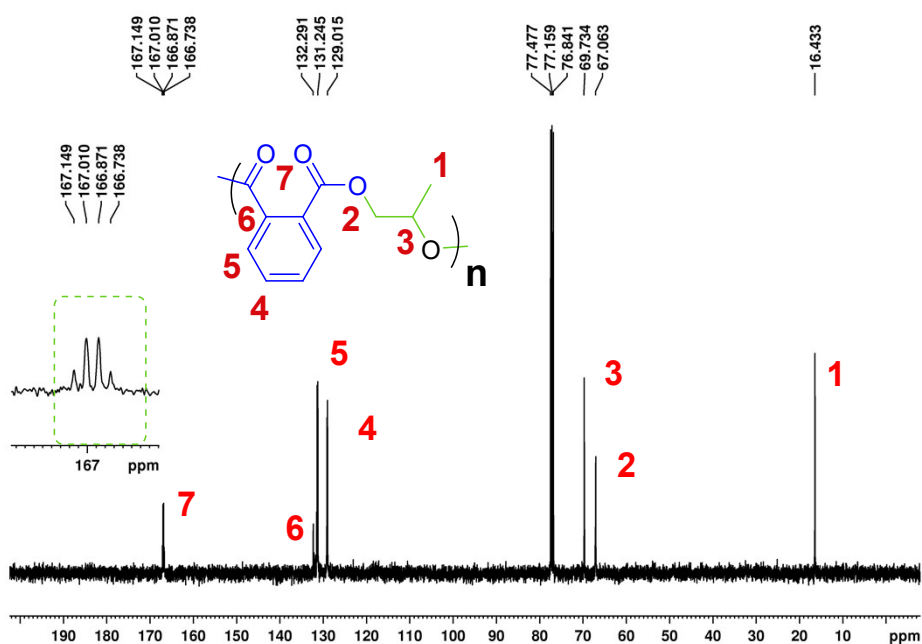

**Figure S15**  $^{13}\text{C}$  NMR spectrum ( $\text{CDCl}_3$ , 400 MHz, 298K) of P(PA-*alt*-PO) copolymer derived by the action of  $\text{I}_2$  and *t*BuOK ( $\text{I}_2/\text{tBuOK}/\text{PA}/\text{PO} = 1:1:100:400$ ), (entry 13, Table 2).

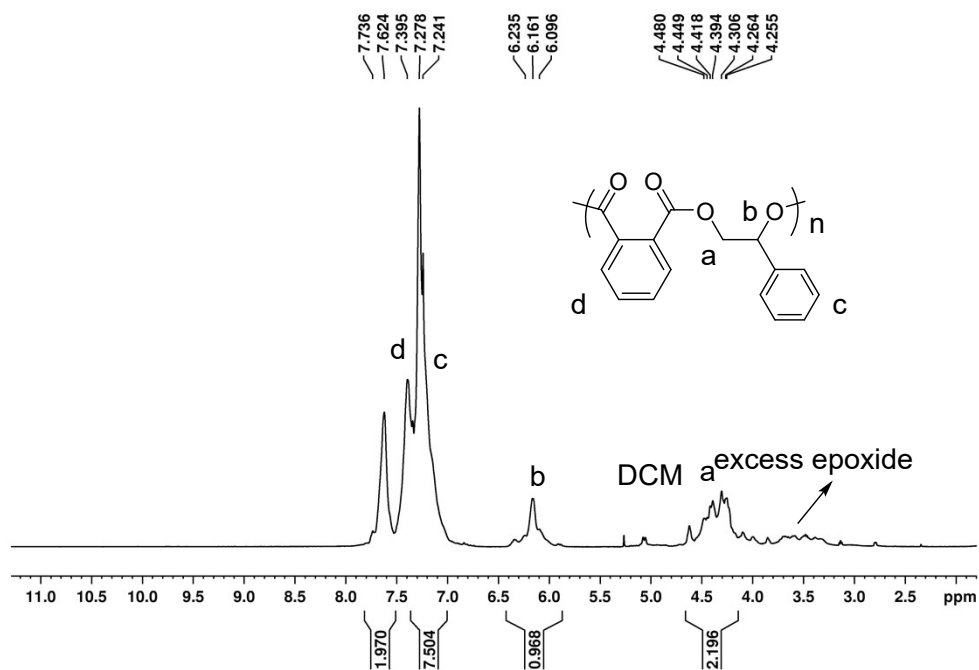

**Figure S16**  $^1\text{H}$  NMR spectrum ( $\text{CDCl}_3$ , 400 MHz, 298K) of P(PA-*alt*-SO) copolymer derived by the action of  $\text{I}_2$  and *t*BuOK ( $\text{I}_2/\text{tBuOK}/\text{PA}/\text{SO} = 1:1:100:400$ ), (entry 10, Table 2).

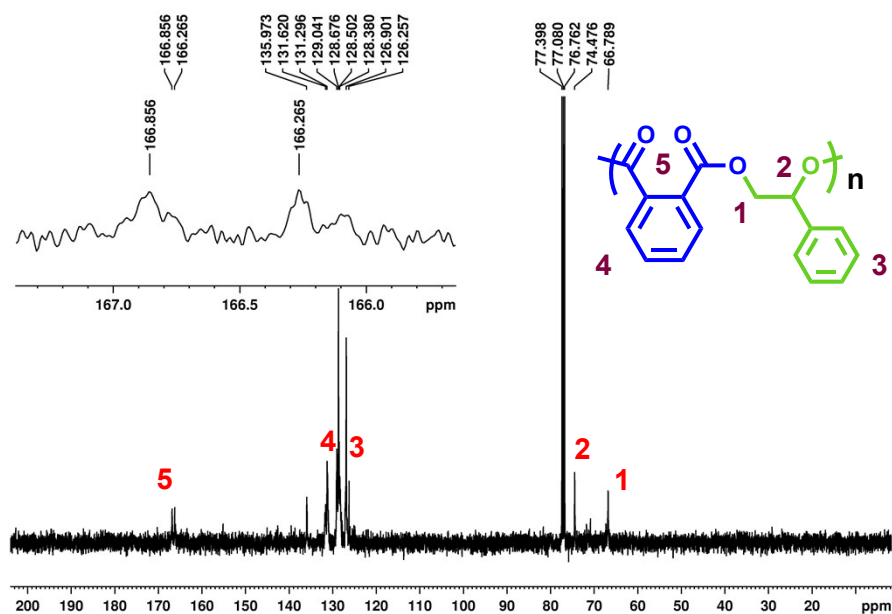

**Figure S17**  $^{13}\text{C}$  NMR spectrum ( $\text{CDCl}_3$ , 400 MHz, 298K) of P(PA-*alt*-SO) copolymer derived by the action of  $\text{I}_2$  and *t*BuOK ( $\text{I}_2/\text{tBuOK}/\text{PA}/\text{SO} = 1:1:100:400$ ), (entry 10, Table 2).

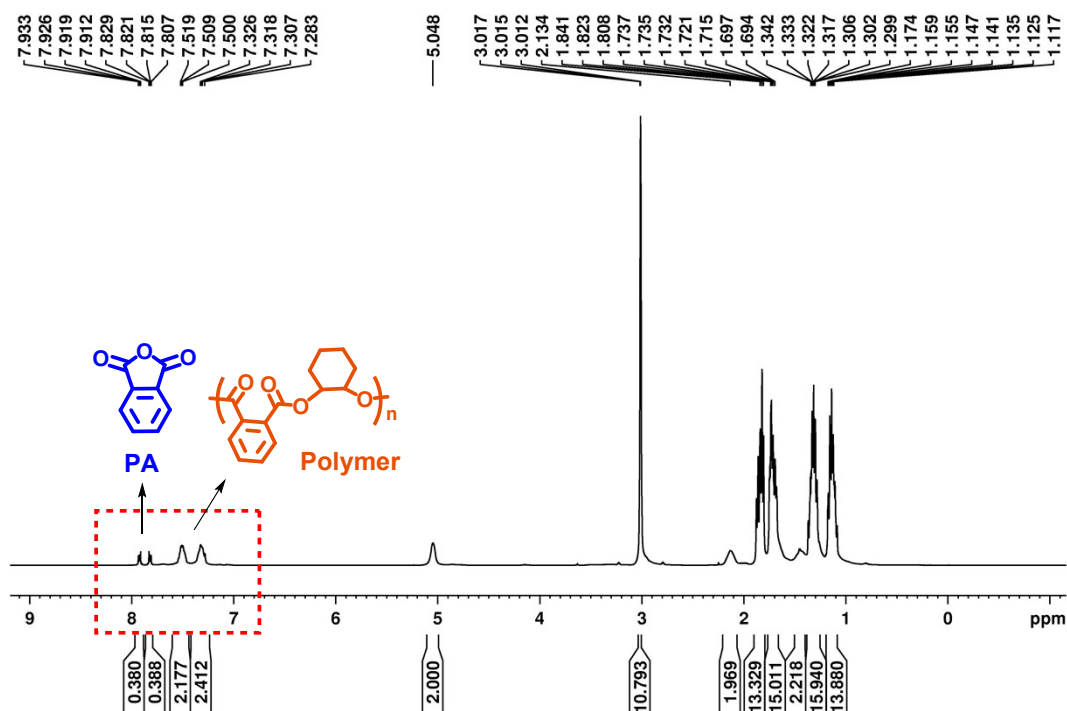

**Figure S18**  $^1\text{H}$  NMR spectrum ( $\text{CDCl}_3$ , 400 MHz, 298K) of P(PA-*alt*-CHO) copolymer derived by the action of  $\text{I}_2$  and *t*BuOK ( $\text{I}_2/\text{tBuOK}/\text{PA}/\text{PO} = 1:1:100:400$ ), at 70 °C.

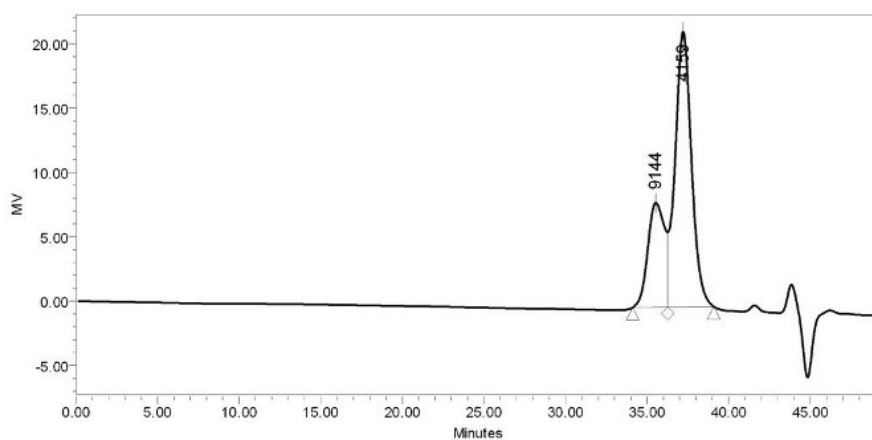

**GPC Results**

| Dist Name | Mn   | Mw   | MP   | Mz   | Mz+1  | Mv | Poly dispersity | MW Marker 1 | MW Marker 2 |
|-----------|------|------|------|------|-------|----|-----------------|-------------|-------------|
| 1         | 8906 | 9264 | 9144 | 9656 | 10078 |    | 1.040161        |             |             |
| 2         | 3984 | 4193 | 4159 | 4396 | 4593  |    | 1.052442        |             |             |

**Figure S19** GPC trace of purified product, P(PA-*alt*-CHO) copolymer derived by the action of  $\text{I}_2$  and  $\text{CH}_3\text{OK}$  ( $\text{I}_2/\text{CH}_3\text{OK}/\text{PA}/\text{CHO} = 1:1:100:300$ ), (entry 3, Table 1).



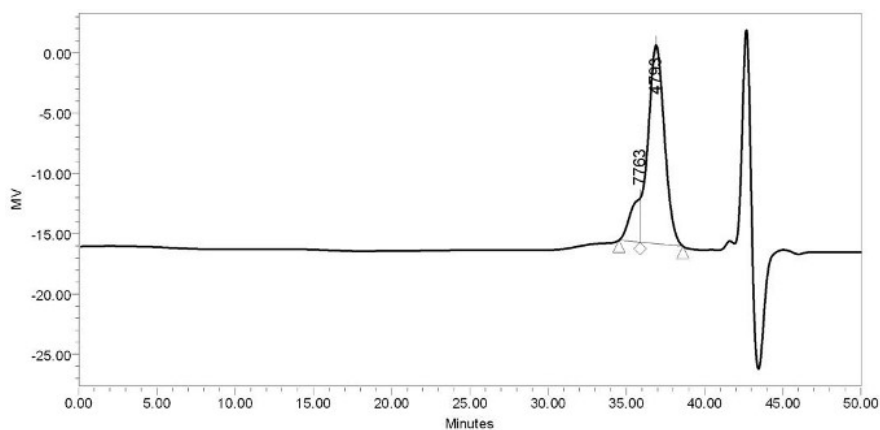

| GPC Results |      |      |      |      |      |    |                 |             |             |
|-------------|------|------|------|------|------|----|-----------------|-------------|-------------|
| Dist Name   | Mn   | Mw   | MP   | Mz   | Mz+1 | Mv | Poly dispersity | MW Marker 1 | MW Marker 2 |
| 1           | 9379 | 9557 | 7763 | 9752 | 9962 |    | 1.018992        |             |             |
| 2           | 4606 | 4855 | 4793 | 5106 | 5353 |    | 1.054183        |             |             |

**Figure S20** GPC trace of purified product P(PA-*alt*-CHO) copolymer derived by the action of I<sub>2</sub> and CH<sub>3</sub>OLi (I<sub>2</sub>/CH<sub>3</sub>OLi/PA/CHO = 1:1:100:400), (entry 6, Table 1).

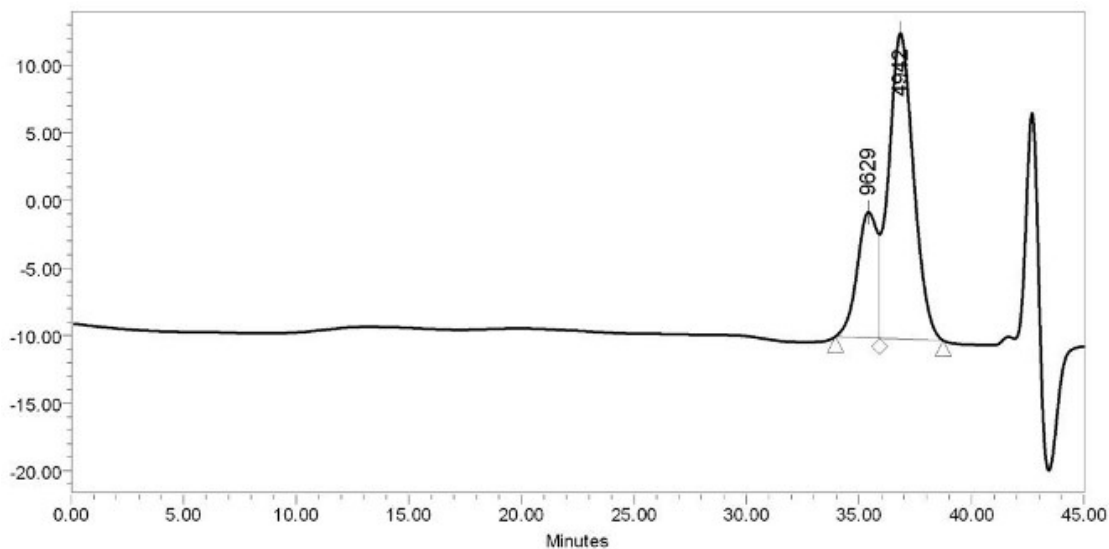

| GPC Results |      |       |      |       |       |    |                 |             |             |
|-------------|------|-------|------|-------|-------|----|-----------------|-------------|-------------|
| Dist Name   | Mn   | Mw    | MP   | Mz    | Mz+1  | Mv | Poly dispersity | MW Marker 1 | MW Marker 2 |
| 1           | 9953 | 10281 | 9629 | 10654 | 11070 |    | 1.032960        |             |             |
| 2           | 4643 | 4921  | 4942 | 5190  | 5446  |    | 1.059809        |             |             |

**Figure S21** GPC trace of purified product P(PA-*alt*-CHO) copolymer derived by the action of I<sub>2</sub> and CH<sub>3</sub>ONa (I<sub>2</sub>/CH<sub>3</sub>ONa/PA/CHO = 1:1:100:400), (entry 7, Table 1).

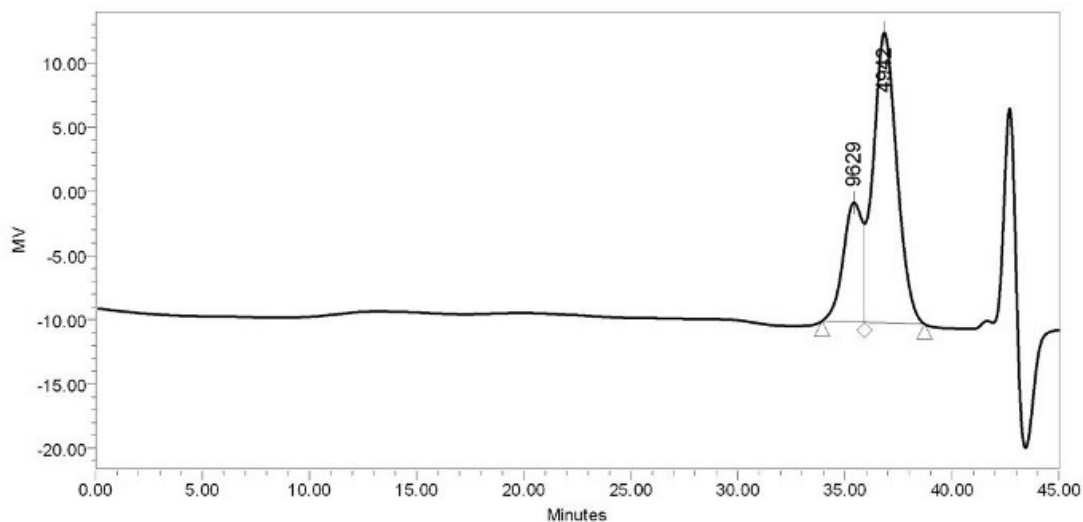

**GPC Results**

| Dist Name | Mn   | Mw    | MP   | Mz    | Mz+1  | Mv | Poly dispersity | MW Marker 1 | MW Marker 2 |
|-----------|------|-------|------|-------|-------|----|-----------------|-------------|-------------|
| 1         | 9986 | 10300 | 9629 | 10682 | 11112 |    | 1.033573        |             |             |
| 2         | 4647 | 4923  | 4942 | 5192  | 5448  |    | 1.059440        |             |             |

**Figure S22** GPC trace of purified product P(PA-*alt*-CHO) copolymer derived by the action of I<sub>2</sub> and CH<sub>3</sub>OK (I<sub>2</sub>/CH<sub>3</sub>OK/PA/CHO = 1:1:100:400), (entry 8, Table 1).

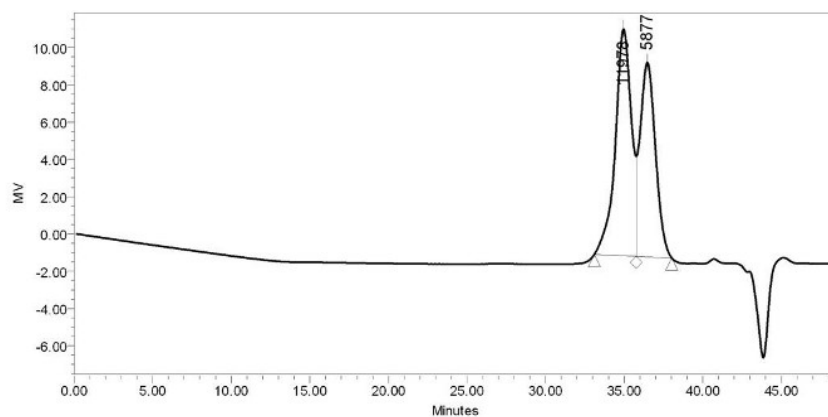

**GPC Results**

| Dist Name | Mn    | Mw    | MP    | Mz    | Mz+1  | Mv | Poly dispersity | MW Marker 1 | MW Marker 2 |
|-----------|-------|-------|-------|-------|-------|----|-----------------|-------------|-------------|
| 1         | 12014 | 12691 | 11978 | 13510 | 14485 |    | 1.056373        |             |             |
| 2         | 5579  | 5820  | 5877  | 6050  | 6265  |    | 1.043214        |             |             |

**Figure S23** GPC trace of purified product P(PA-*alt*-CHO) copolymer derived by the action of I<sub>2</sub> and *i*PrOK (I<sub>2</sub>/*i*PrOK /PA/CHO = 1:1:100:400), (entry 12, Table 1).

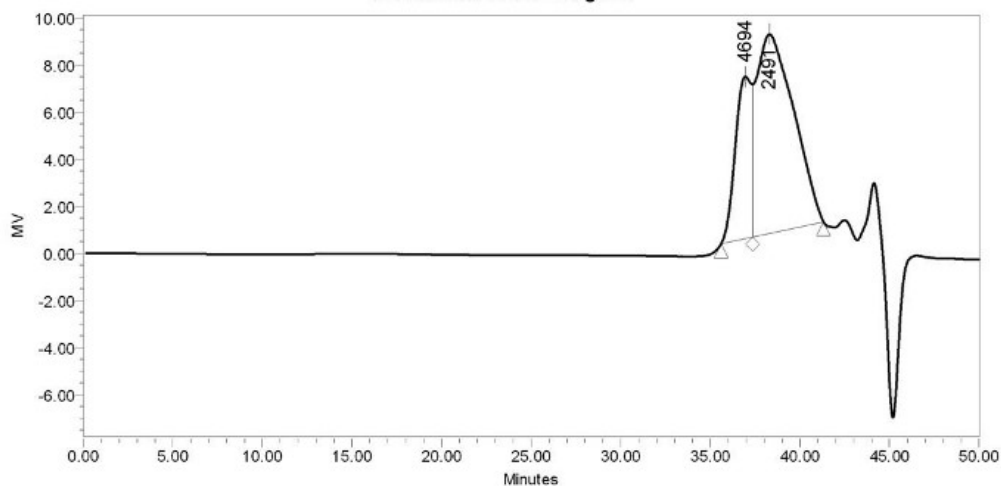

**GPC Results**

| Dist Name | Mn   | Mw   | MP   | Mz   | Mz+1 | Mv | Poly dispersity | MW Marker 1 | MW Marker 2 |
|-----------|------|------|------|------|------|----|-----------------|-------------|-------------|
| 1         | 4975 | 5126 | 4694 | 5292 | 5473 |    | 1.030294        |             |             |
| 2         | 1808 | 2151 | 2491 | 2469 | 2730 |    | 1.189554        |             |             |

**Figure S24** GPC trace of purified product P(PA-*alt*-CHO) copolymer derived by the action of I<sub>2</sub> and *t*BuOLi (I<sub>2</sub>/*t*BuOLi/PA/CHO = 1:1:100:400), (entry 13, Table 1).

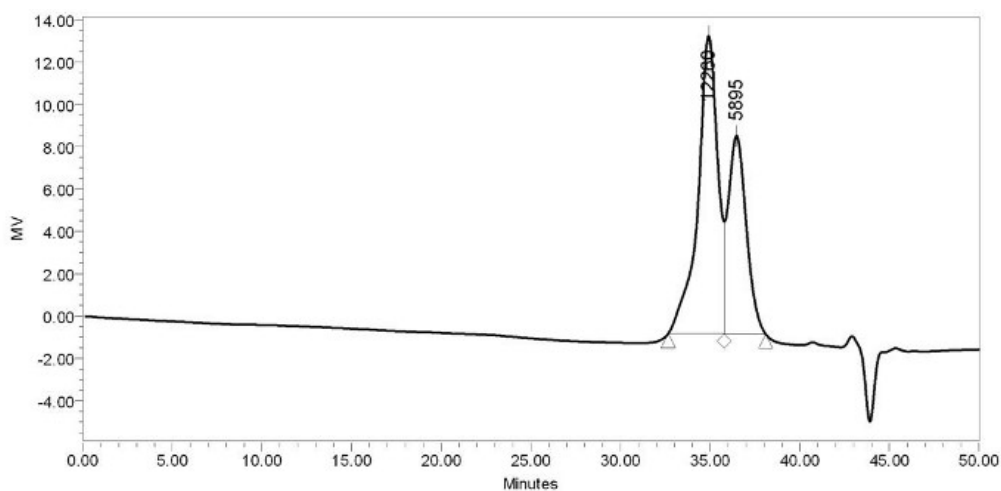

**GPC Results**

| Dist Name | Mn    | Mw    | MP    | Mz    | Mz+1  | Mv | Poly dispersity | MW Marker 1 | MW Marker 2 |
|-----------|-------|-------|-------|-------|-------|----|-----------------|-------------|-------------|
| 1         | 12557 | 13556 | 12260 | 14873 | 16550 |    | 1.079515        |             |             |
| 2         | 5518  | 5775  | 5895  | 6017  | 6239  |    | 1.046578        |             |             |

**Figure S25** GPC trace of purified product of P(PA-*alt*-CHO) copolymer derived by the action of I<sub>2</sub> and *t*BuONa (I<sub>2</sub>/*t*BuONa/PA/CHO = 1:1:100:400), (entry 14, Table 1).

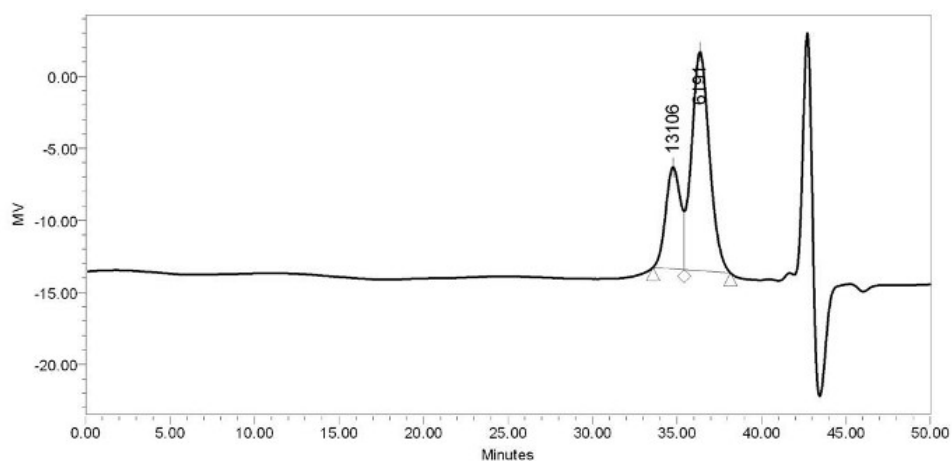

GPC Results

| Dist Name | Mn    | Mw    | MP    | Mz    | Mz+1  | Mv | Poly dispersity | MW Marker 1 | MW Marker 2 |
|-----------|-------|-------|-------|-------|-------|----|-----------------|-------------|-------------|
| 1         | 12913 | 13315 | 13106 | 13746 | 14201 |    | 1.031164        |             |             |
| 2         | 5829  | 6155  | 6191  | 6472  | 6774  |    | 1.055935        |             |             |

**Figure S26** GPC trace of purified product P(PA-*alt*-CHO) copolymer derived by the action of I<sub>2</sub> and *t*BuOK (I<sub>2</sub>/*t*BuOK/PA/CHO = 1:1:100:400), (entry 15, Table 1).

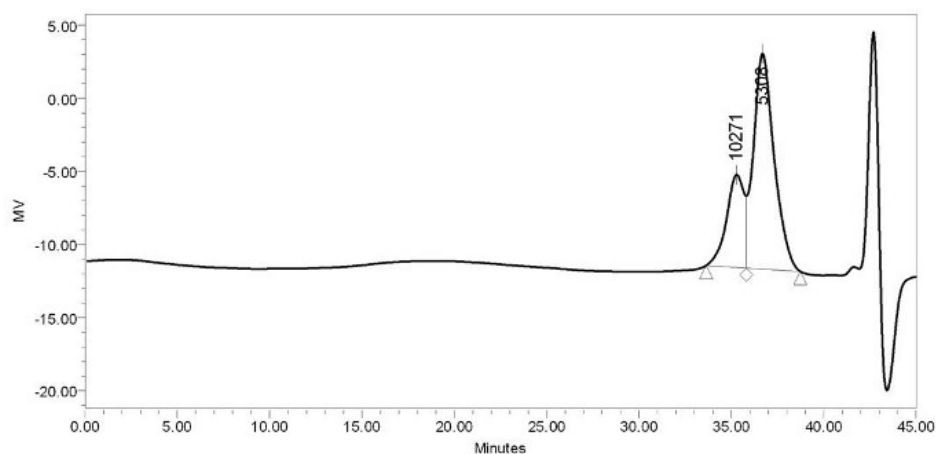

GPC Results

| Dist Name | Mn    | Mw    | MP    | Mz    | Mz+1  | Mv | Poly dispersity | MW Marker 1 | MW Marker 2 |
|-----------|-------|-------|-------|-------|-------|----|-----------------|-------------|-------------|
| 1         | 10725 | 11175 | 10271 | 11706 | 12317 |    | 1.042002        |             |             |
| 2         | 4823  | 5142  | 5308  | 5443  | 5720  |    | 1.066224        |             |             |

**Figure S27** GPC trace of purified product P(PA-*alt*-CHO) copolymer derived by the action of I<sub>2</sub>/*t*BuOK (I<sub>2</sub>/*t*BuOK/PA/CHO = 1:1:250:800), (entry 20, Table 1).

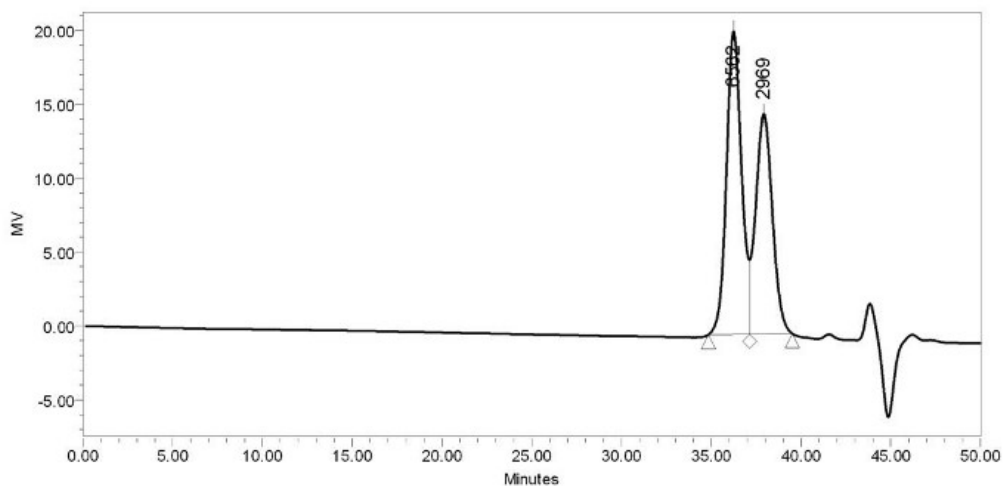

**GPC Results**

| Dist Name | Mn   | Mw   | MP   | Mz   | Mz+1 | Mv | Poly dispersity | MW Marker 1 | MW Marker 2 |
|-----------|------|------|------|------|------|----|-----------------|-------------|-------------|
| 1         | 6336 | 6557 | 6562 | 6788 | 7030 |    | 1.034745        |             |             |
| 2         | 2858 | 2977 | 2969 | 3091 | 3201 |    | 1.041374        |             |             |

**Figure S28** GPC trace of purified product P(PA-*alt*-CHO) copolymer derived by the action of KI (KI/PA/CHO = 1:100:300), (entry 24, Table 1).

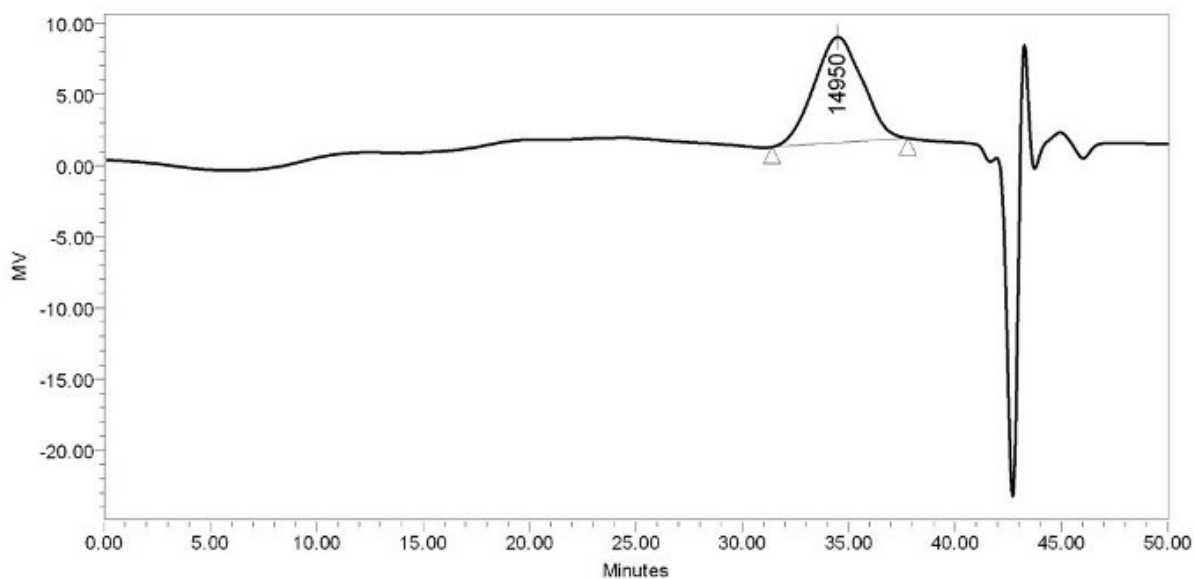

**GPC Results**

| Dist Name | Mn    | Mw    | MP    | Mz    | Mz+1  | Mv | Poly dispersity | MW Marker 1 | MW Marker 2 |
|-----------|-------|-------|-------|-------|-------|----|-----------------|-------------|-------------|
| 1         | 13016 | 16498 | 14950 | 20649 | 25194 |    | 1.267589        |             |             |

**Figure S29** GPC trace of purified product P(PA-*alt*-tBGE) copolymer derived by the action of I<sub>2</sub> and tBuOK (I<sub>2</sub>/tBuOK/PA/tBGE = 1:1:100:400), (entry 1, Table 2).

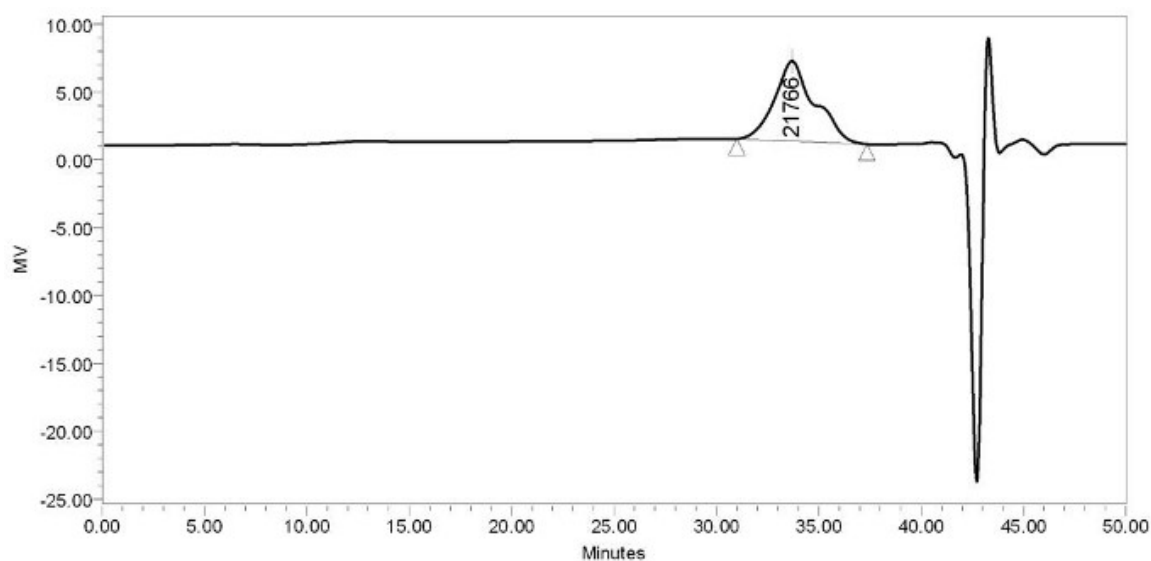

GPC Results

| Dist Name | Mn    | Mw    | MP    | Mz    | Mz+1  | Mv | Poly dispersity | MW Marker 1 | MW Marker 2 |
|-----------|-------|-------|-------|-------|-------|----|-----------------|-------------|-------------|
| 1         | 17159 | 21593 | 21766 | 26406 | 31379 |    | 1.258380        |             |             |

**Figure S30** GPC trace of purified product P(PA-*alt*-tBGE) copolymer derived by the action of I<sub>2</sub> and tBuOK (I<sub>2</sub>/tBuOK /PA/tBGE = 1:1:250:800), (entry 2, Table 2).

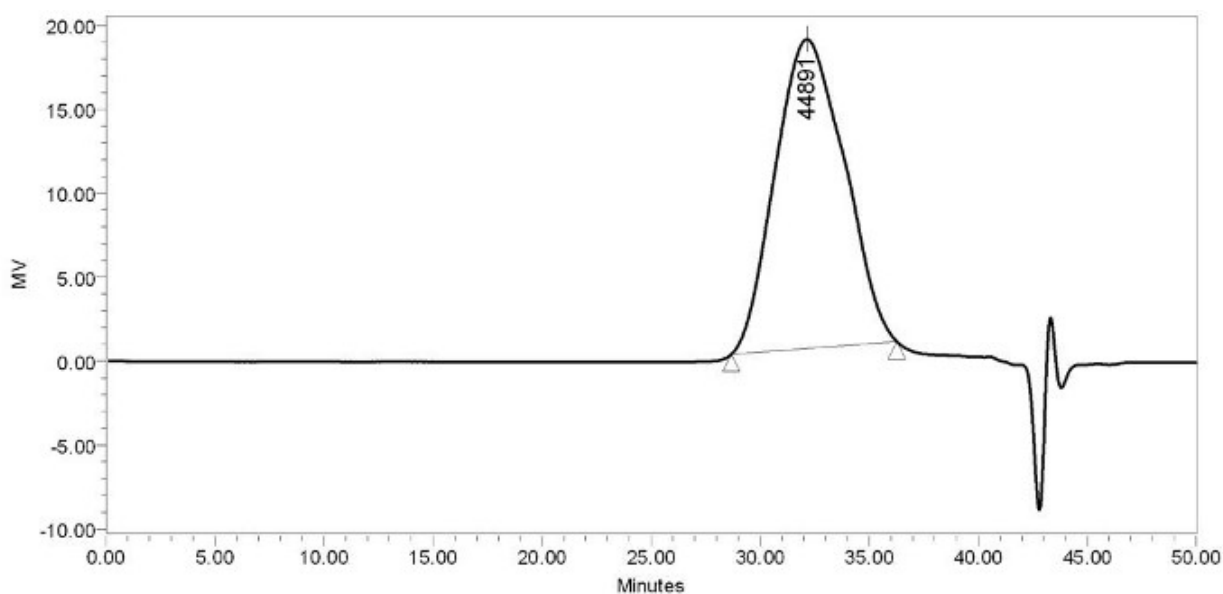

GPC Results

| Dist Name | Mn    | Mw    | MP    | Mz    | Mz+1  | Mv | Poly dispersity | MW Marker 1 | MW Marker 2 |
|-----------|-------|-------|-------|-------|-------|----|-----------------|-------------|-------------|
| 1         | 32989 | 49958 | 44891 | 71228 | 93004 |    | 1.514397        |             |             |

**Figure S31** GPC trace of purified product P(PA-*alt*-tBGE) copolymer derived by the action of I<sub>2</sub> and tBuOK (I<sub>2</sub>/tBuOK /PA/tBGE = 1:1:500:1200), (entry 3, Table 2).

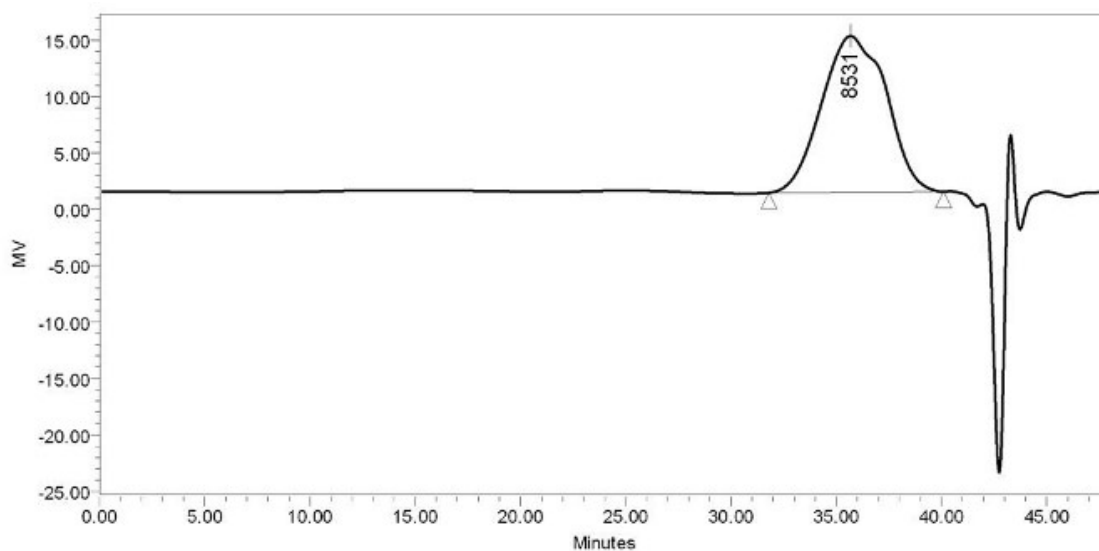

**GPC Results**

| Dist Name | Mn   | Mw   | MP   | Mz    | Mz+1  | Mv | Poly dispersity | MW Marker 1 | MW Marker 2 |
|-----------|------|------|------|-------|-------|----|-----------------|-------------|-------------|
| 1         | 6440 | 9423 | 8531 | 13441 | 18024 |    | 1.463186        |             |             |

**Figure S32** GPC trace of purified product P(PA-*alt*-PGE) copolymer derived by the action of I<sub>2</sub> and *t*BuOK (I<sub>2</sub>/*t*BuOK /PA/PGE = 1:1:100:400), (entry 4, Table 2).

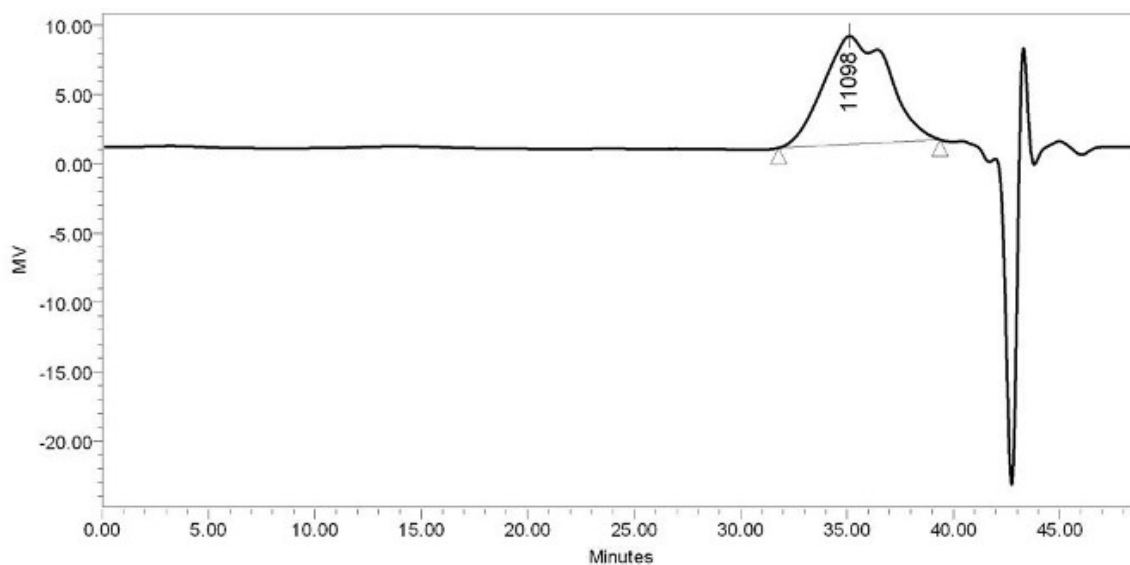

**GPC Results**

| Dist Name | Mn   | Mw    | MP    | Mz    | Mz+1  | Mv | Poly dispersity | MW Marker 1 | MW Marker 2 |
|-----------|------|-------|-------|-------|-------|----|-----------------|-------------|-------------|
| 1         | 7565 | 11176 | 11098 | 15793 | 20682 |    | 1.477361        |             |             |

**Figure S33** GPC trace of purified product P(PA-*alt*-PGE) copolymer derived by the action of I<sub>2</sub> and *t*BuOK (I<sub>2</sub>/*t*BuOK /PA/PGE = 1:1:250:800), (entry 5, Table 2).

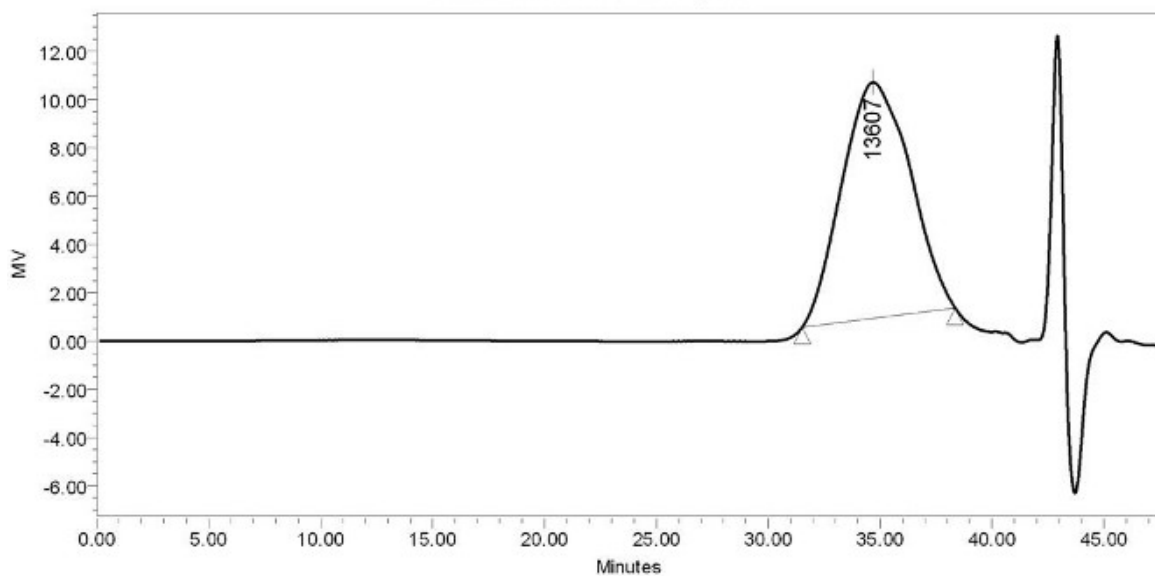

GPC Results

| Dist Name | Mn    | Mw    | MP    | Mz    | Mz+1  | Mv | Poly dispersity | MW Marker 1 | MW Marker 2 |
|-----------|-------|-------|-------|-------|-------|----|-----------------|-------------|-------------|
| 1         | 10366 | 14989 | 13607 | 20706 | 26493 |    | 1.446044        |             |             |

**Figure S34** GPC trace of purified product of P(PA-*alt*-PGE) copolymer derived by the action of I<sub>2</sub> and *t*BuOK (I<sub>2</sub>/*t*BuOK/PA/PGE = 1:1:500:1200), (entry 6, Table 2).

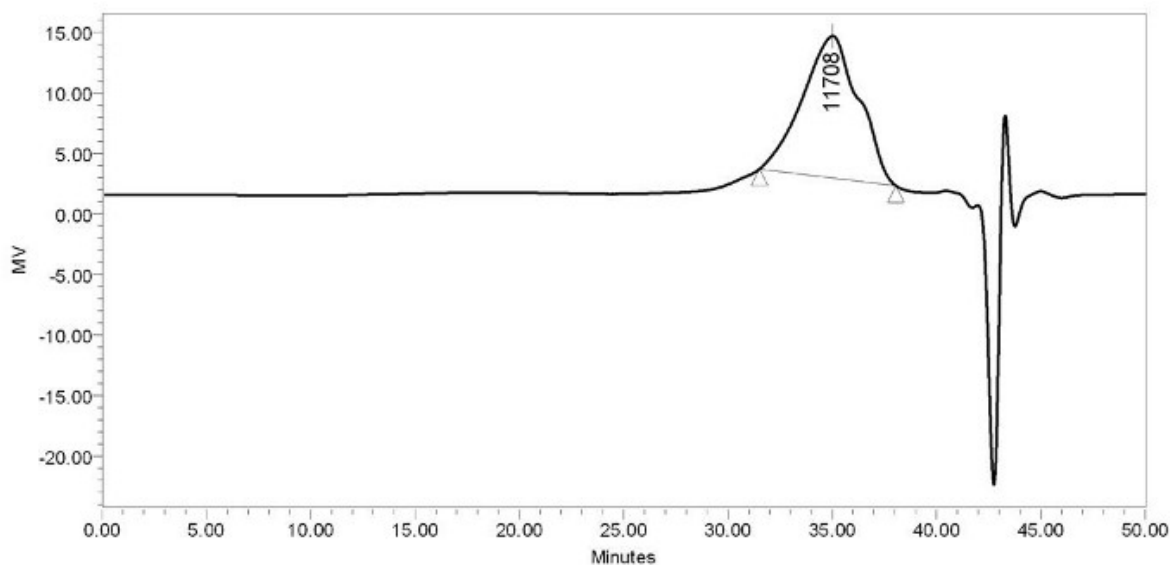

GPC Results

| Dist Name | Mn    | Mw    | MP    | Mz    | Mz+1  | Mv | Poly dispersity | MW Marker 1 | MW Marker 2 |
|-----------|-------|-------|-------|-------|-------|----|-----------------|-------------|-------------|
| 1         | 10406 | 14488 | 11708 | 20019 | 26203 |    | 1.392364        |             |             |

**Figure S35** GPC trace of purified product P(PA-*alt*-AGE) copolymer derived by the action of I<sub>2</sub> and *t*BuOK (I<sub>2</sub>/*t*BuOK/PA/AGE = 1:1:100:400), (entry 7, Table 2).



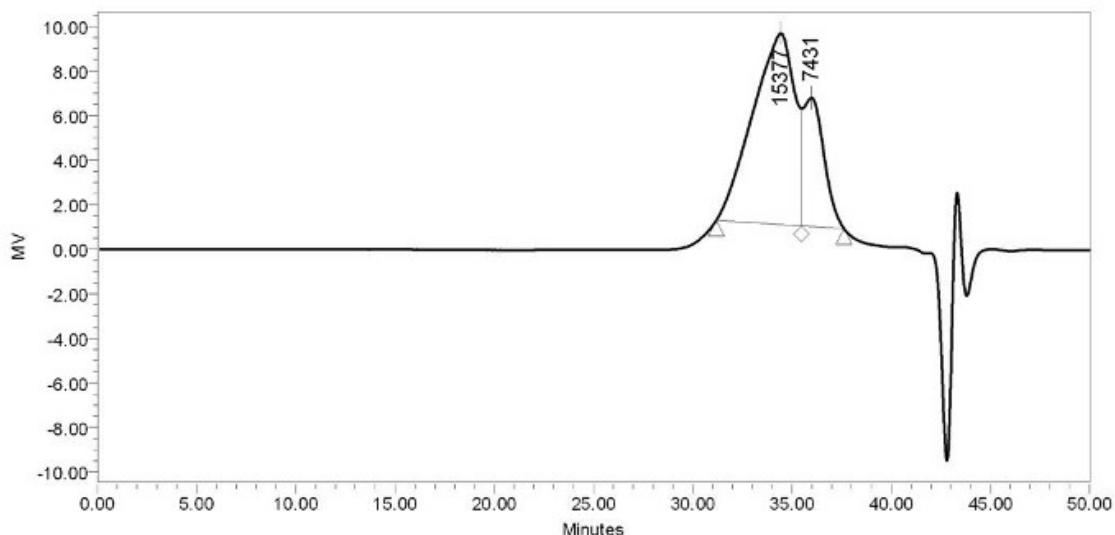

GPC Results

| Dist Name | Mn    | Mw    | MP    | Mz    | Mz+1  | Mv | Poly dispersity | MW Marker 1 | MW Marker 2 |
|-----------|-------|-------|-------|-------|-------|----|-----------------|-------------|-------------|
| 1         | 17891 | 21696 | 15377 | 26858 | 32785 |    | 1.212674        |             |             |
| 2         | 6680  | 6984  | 7431  | 7264  | 7515  |    | 1.045599        |             |             |

**Figure S36** GPC trace of purified product P(PA-*alt*-AGE) copolymer derived by the action of I<sub>2</sub> and *t*BuOK (I<sub>2</sub>/*t*BuOK/PA/AGE = 1:1:250:800), (entry 8, Table 2).

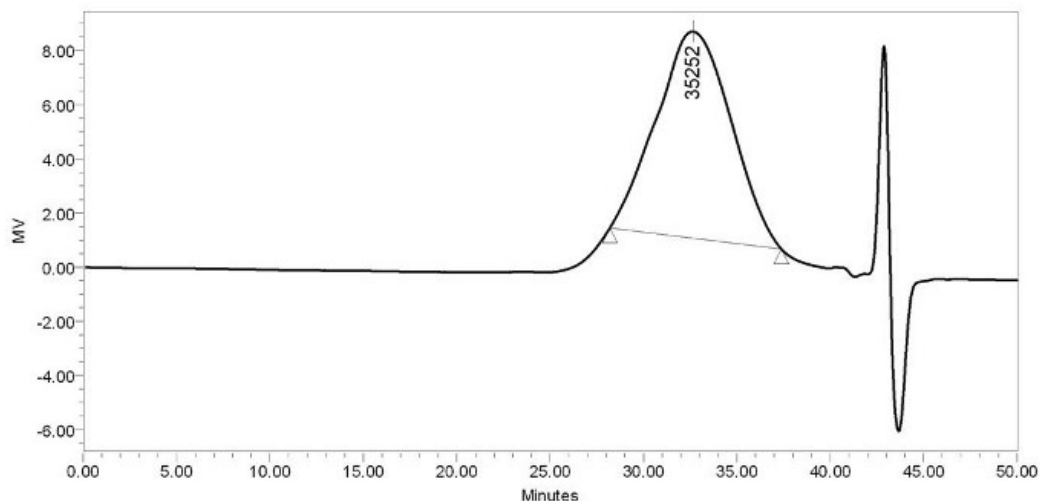

GPC Results

| Dist Name | Mn    | Mw    | MP    | Mz    | Mz+1   | Mv | Poly dispersity | MW Marker 1 | MW Marker 2 |
|-----------|-------|-------|-------|-------|--------|----|-----------------|-------------|-------------|
| 1         | 24824 | 48110 | 35252 | 85033 | 124271 |    | 1.938040        |             |             |

**Figure S37** GPC trace of purified product P(PA-*alt*-AGE) copolymer derived by the action of I<sub>2</sub> and *t*BuOK (I<sub>2</sub>/*t*BuOK/PA/AGE = 1:1:500:1200), (entry 9, Table 2).

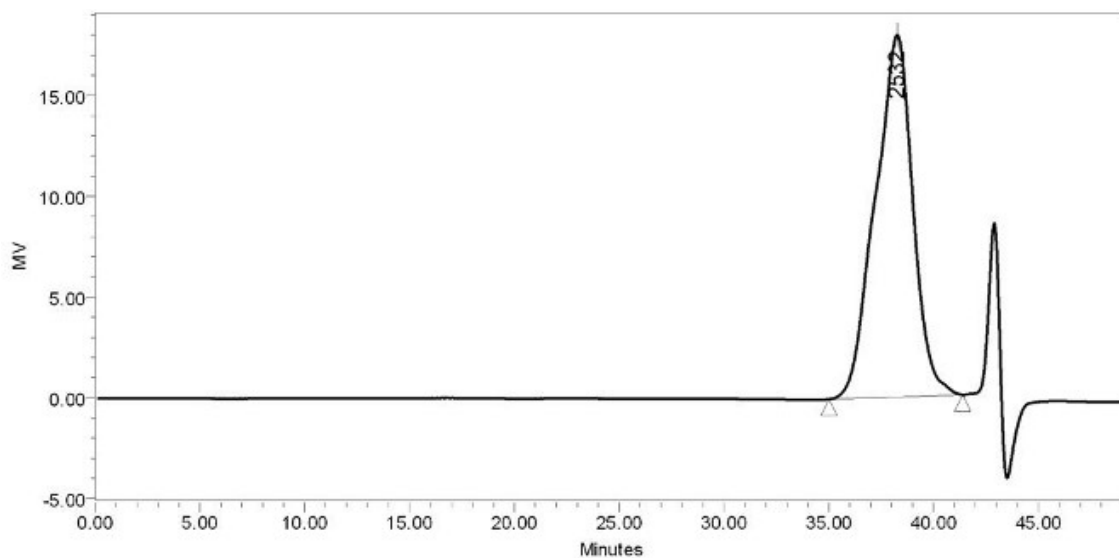

**GPC Results**

| Dist Name | Mn   | Mw   | MP   | Mz   | Mz+1 | Mv | Poly dispersity | MW Marker 1 | MW Marker 2 |
|-----------|------|------|------|------|------|----|-----------------|-------------|-------------|
| 1         | 2536 | 3006 | 2532 | 3557 | 4179 |    | 1.185228        |             |             |

**Figure S38** GPC trace of purified product P(PA-*alt*-SO) copolymer derived by the action of I<sub>2</sub> and *t*BuOK (I<sub>2</sub>/*t*BuOK/PA/SO = 1:1:100:400), (entry 10, Table 2).

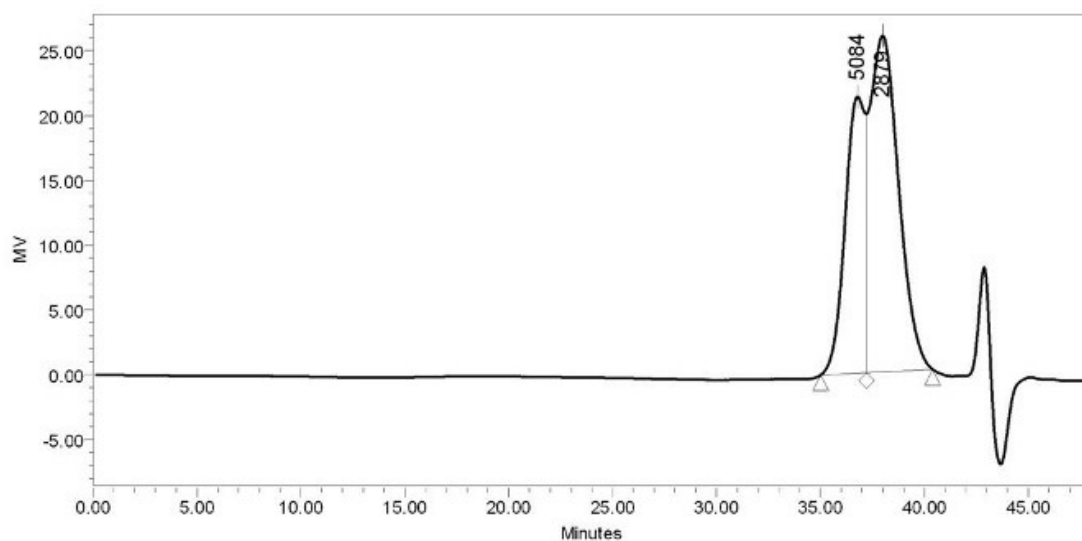

**GPC Results**

| Dist Name | Mn   | Mw   | MP   | Mz   | Mz+1 | Mv | Poly dispersity | MW Marker 1 | MW Marker 2 |
|-----------|------|------|------|------|------|----|-----------------|-------------|-------------|
| 1         | 5438 | 5645 | 5084 | 5885 | 6159 |    | 1.037966        |             |             |
| 2         | 2532 | 2748 | 2879 | 2942 | 3111 |    | 1.085162        |             |             |

**Figure S39** GPC trace of purified product P(PA-*alt*-SO) copolymer derived by the action of I<sub>2</sub> and *t*BuOK (I<sub>2</sub>/*t*BuOK/PA/SO = 1:1:250:800), Table (entry 11, Table 2).

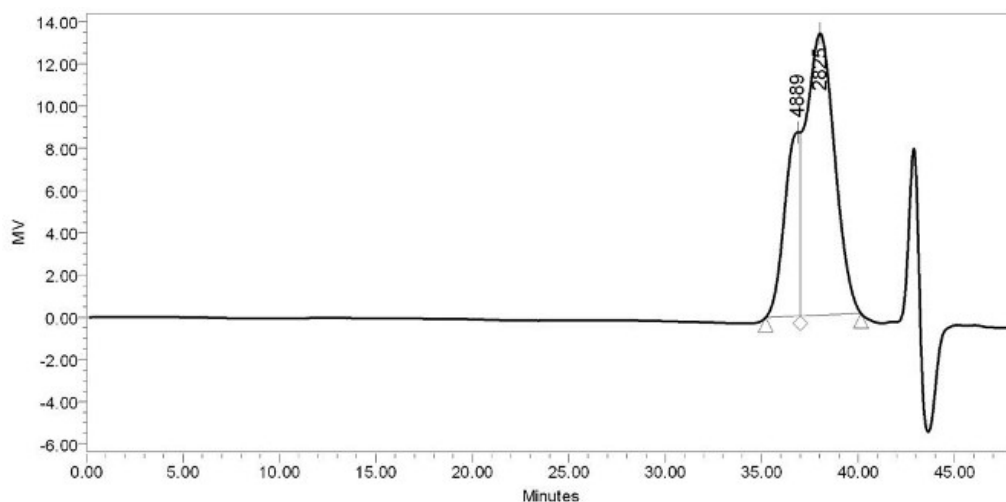

GPC Results

| Dist Name | Mn   | Mw   | MP   | Mz   | Mz+1 | Mv | Poly dispersity | MW Marker 1 | MW Marker 2 |
|-----------|------|------|------|------|------|----|-----------------|-------------|-------------|
| 1         | 5756 | 5919 | 4889 | 6105 | 6314 |    | 1.028316        |             |             |
| 2         | 2616 | 2863 | 2825 | 3099 | 3313 |    | 1.094261        |             |             |

**Figure S40** GPC trace of purified product P(PA-*alt*-SO) copolymer derived by the action of I<sub>2</sub> and *t*BuOK (I<sub>2</sub>/*t*BuOK/PA/SO = 1:1:500:1200), (entry 12, Table 2).

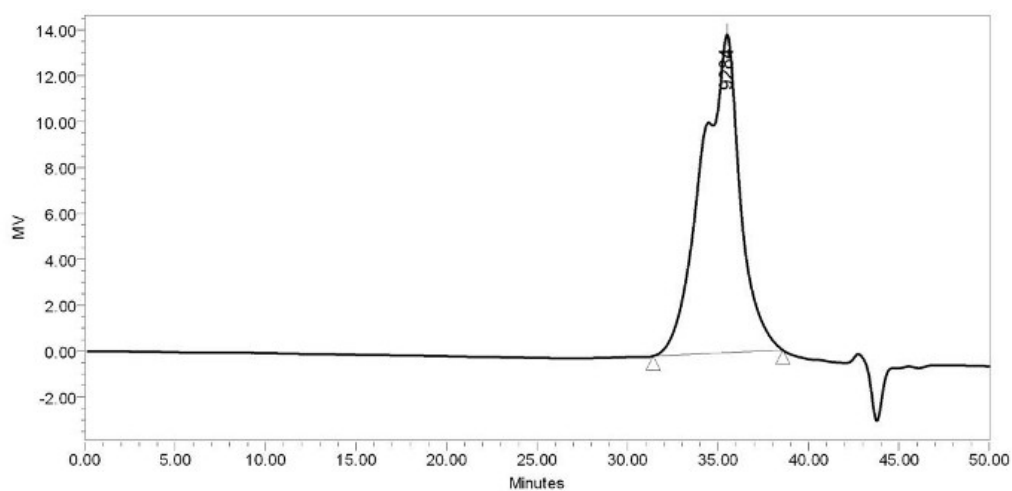

GPC Results

| Dist Name | Mn    | Mw    | MP   | Mz    | Mz+1  | Mv | Poly dispersity | MW Marker 1 | MW Marker 2 |
|-----------|-------|-------|------|-------|-------|----|-----------------|-------------|-------------|
| 1         | 10030 | 13083 | 9284 | 17035 | 21762 |    | 1.304315        |             |             |

**Figure S41** GPC trace of purified product P(PA-*alt*-PO) copolymer derived by the action of I<sub>2</sub> and *t*BuOK (I<sub>2</sub>/*t*BuOK/PA/PO = 1:1:100:400), (entry 13, Table 2).

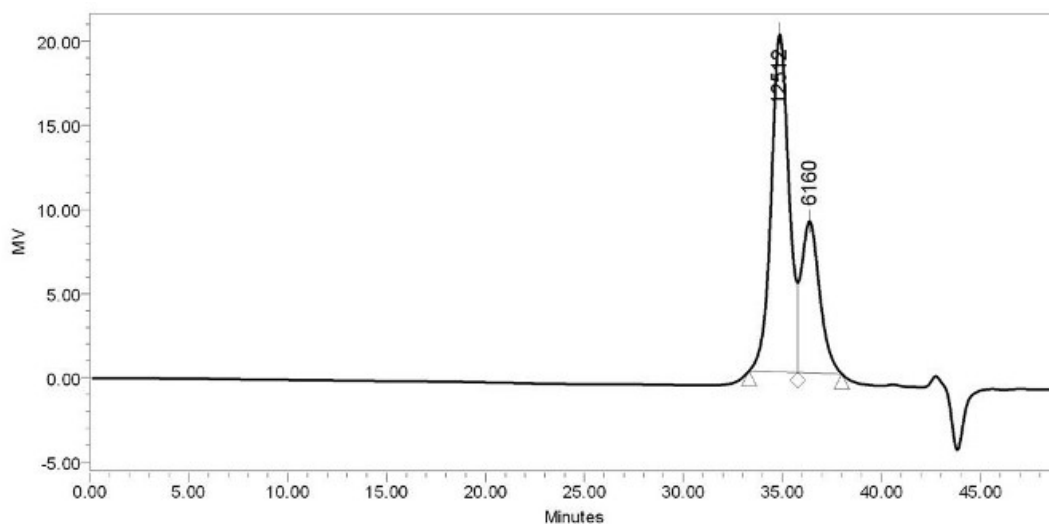

GPC Results

| Dist Name | Mn    | Mw    | MP    | Mz    | Mz+1  | Mv | Poly dispersity | MW Marker 1 | MW Marker 2 |
|-----------|-------|-------|-------|-------|-------|----|-----------------|-------------|-------------|
| 1         | 12177 | 12672 | 12512 | 13213 | 13802 |    | 1.040690        |             |             |
| 2         | 5749  | 5989  | 6160  | 6210  | 6411  |    | 1.041783        |             |             |

**Figure S42** GPC trace of purified product P(PA-*alt*-PO) copolymer derived by the action of  $I_2$  and *t*BuOK ( $I_2/t$ BuOK/PA/PO = 1:1:250:800), (entry 14, Table 2).

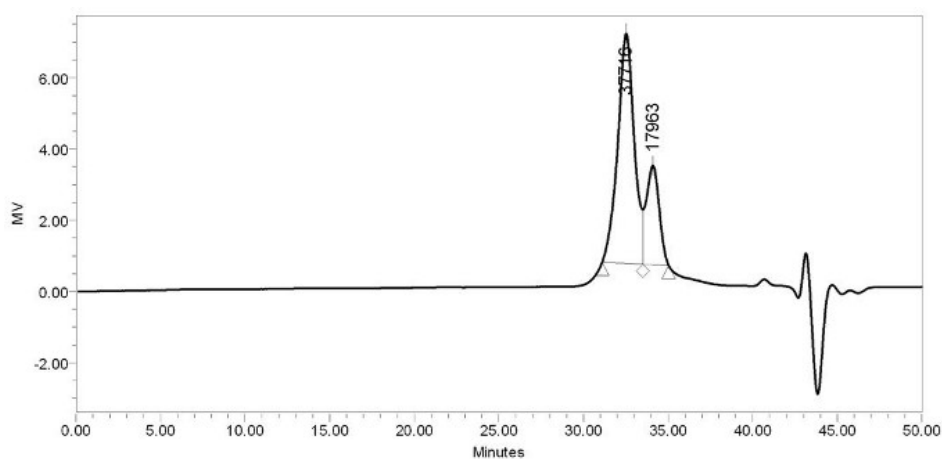

GPC Results

| Dist Name | Mn    | Mw    | MP    | Mz    | Mz+1  | Mv | Poly dispersity | MW Marker 1 | MW Marker 2 |
|-----------|-------|-------|-------|-------|-------|----|-----------------|-------------|-------------|
| 1         | 37147 | 38959 | 37716 | 40907 | 42969 |    | 1.048774        |             |             |
| 2         | 17805 | 18227 | 17963 | 18644 | 19049 |    | 1.023713        |             |             |

**Figure S43** GPC trace of purified product P(PA-*alt*-PO) copolymer derived by the action of  $I_2$  and *t*BuOK ( $I_2/t$ BuOK/PA/PO = 1:1:500:1200), (entry 15, Table 2).

**Table S1** ROAC of phthalic anhydride with cyclohexane oxide at various temperature and time using most active I<sub>2</sub>/tBuOK catalyst.

| Entry | Catalysts <sup>a</sup> | PA/CHO  | T(°C) | t (h <sup>-1</sup> ) | Conv. (%) <sup>b</sup> | %ester <sup>c</sup> | Mn <sup>d</sup> (kDa)           | PDI <sup>d</sup> |
|-------|------------------------|---------|-------|----------------------|------------------------|---------------------|---------------------------------|------------------|
| 1     | I <sub>2</sub> :tBuOK  | 100:400 | 25    | 24                   | --                     | --                  | --                              | --               |
| 2     | I <sub>2</sub> :tBuOK  | 100:400 | 50    | 24                   | 48                     | 95                  | --                              | --               |
| 3     | I <sub>2</sub> :tBuOK  | 100:400 | 90    | 0.5                  | 20                     | 99                  | --                              | --               |
| 4     | I <sub>2</sub> :tBuOK  | 100:400 | 90    | 1                    | 40                     | 99                  | 4.10(68)/1.90 (32) <sup>e</sup> | 1.05/1.04        |
| 5     | I <sub>2</sub> :tBuOK  | 100:400 | 90    | 2                    | 85                     | 95                  | 6.65(68)/3.0 (32) <sup>e</sup>  | 1.01/1.05        |
| 6     | I <sub>2</sub> :tBuOK  | 100:400 | 90    | 2.5                  | 99                     | 95                  | 11.35(69)/5.07(31) <sup>f</sup> | 1.02/1.05        |

[<sup>a</sup>] reaction conditions: I<sub>2</sub>:tBuOK (1:1), solvent free. [<sup>b</sup>] Monomer conversion determined by <sup>1</sup>H NMR spectroscopy, [<sup>c</sup>] Calculated by <sup>1</sup>H NMR spectroscopy. [<sup>d</sup>] Mn<sup>(GPC)</sup> measured by GPC at 40 °C in THF relative to polystyrene standards. [<sup>e</sup>] Bimodal distribution.

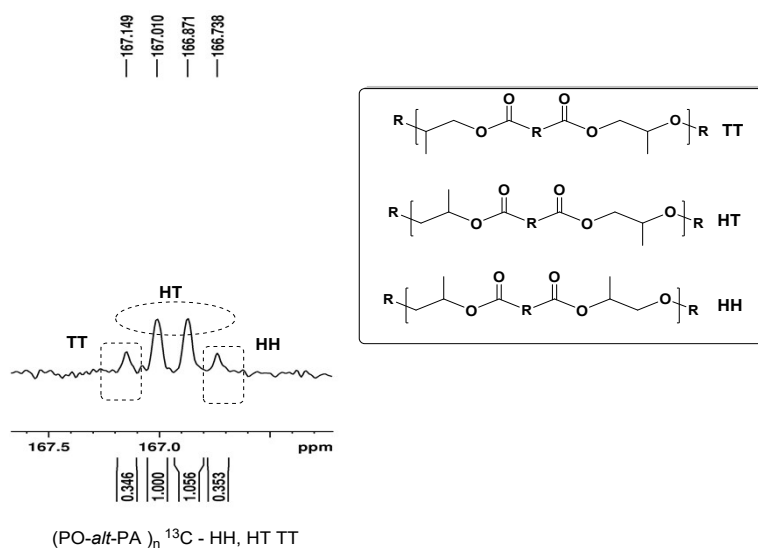

**Figure S44** Regiostructures of polyesters: tail-to-tail (TT), head-to-tail (HT), and head-to-head (HH) junctions, P(PO-*alt*-PA)polymer.

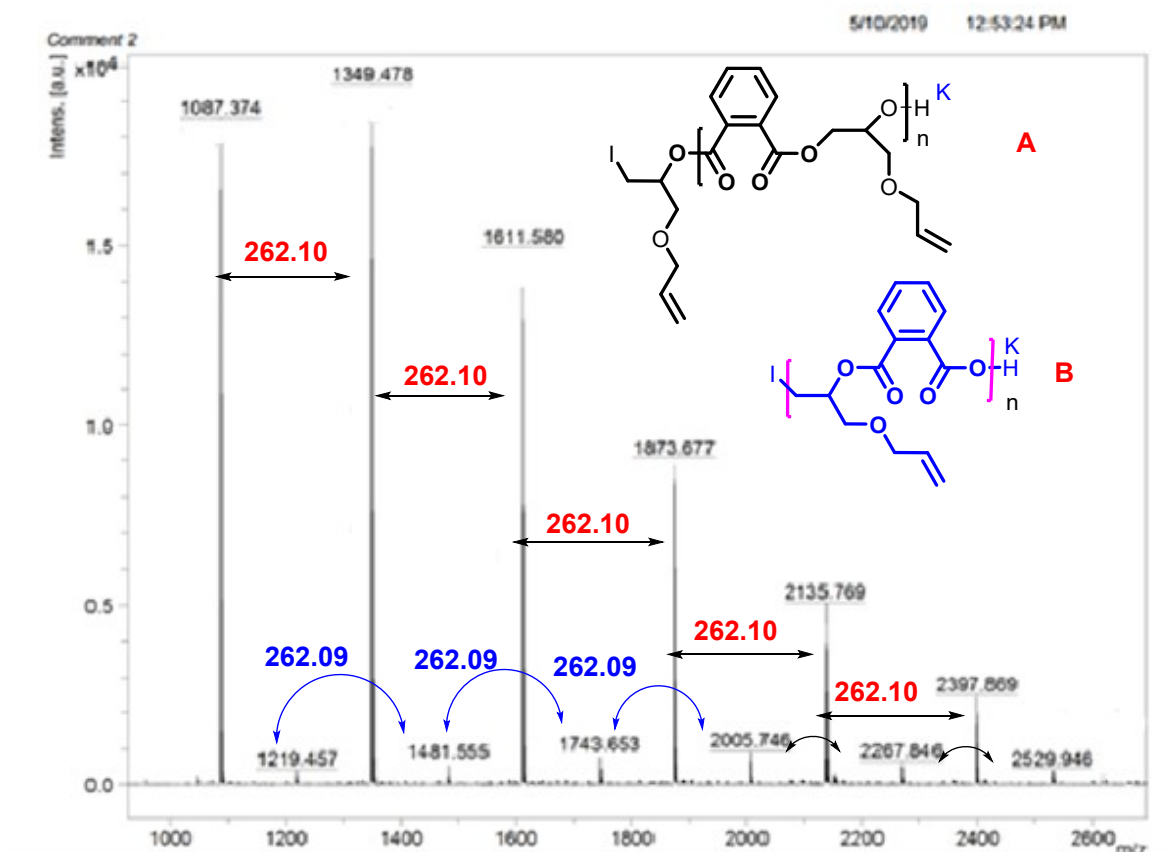

**Figure S45** MALDI-TOF MS spectrum of the short P(PA-*alt*-AGE) precursor synthesized by the catalysis of  $I_2/tBuOK$ . The two (A and B) series shown as  $m/z = [126.90 (I) + 114.14 (AGE) + (262.1 \times n) (PA + AGE) + 39.09 (K^+) + 1.01 (H^+)]$  ( $n = 3 - 8$ ) for A;  $m/z = [126.90 (I) + (262.1 \times n) (PA + AGE) + 39.09 (K^+) + 1.01 (H^+)]$  ( $n = 4 - 9$ ) for B. ( $n =$  number of repeating units). For example: distribution A= 1087.374 (experimental value) and 1088.408 ( $n= 3.08$ ; calculated value). For distribution B = 1219.457 (experimental value) and 1220.642 ( $n= 4.02$ ; calculated value).

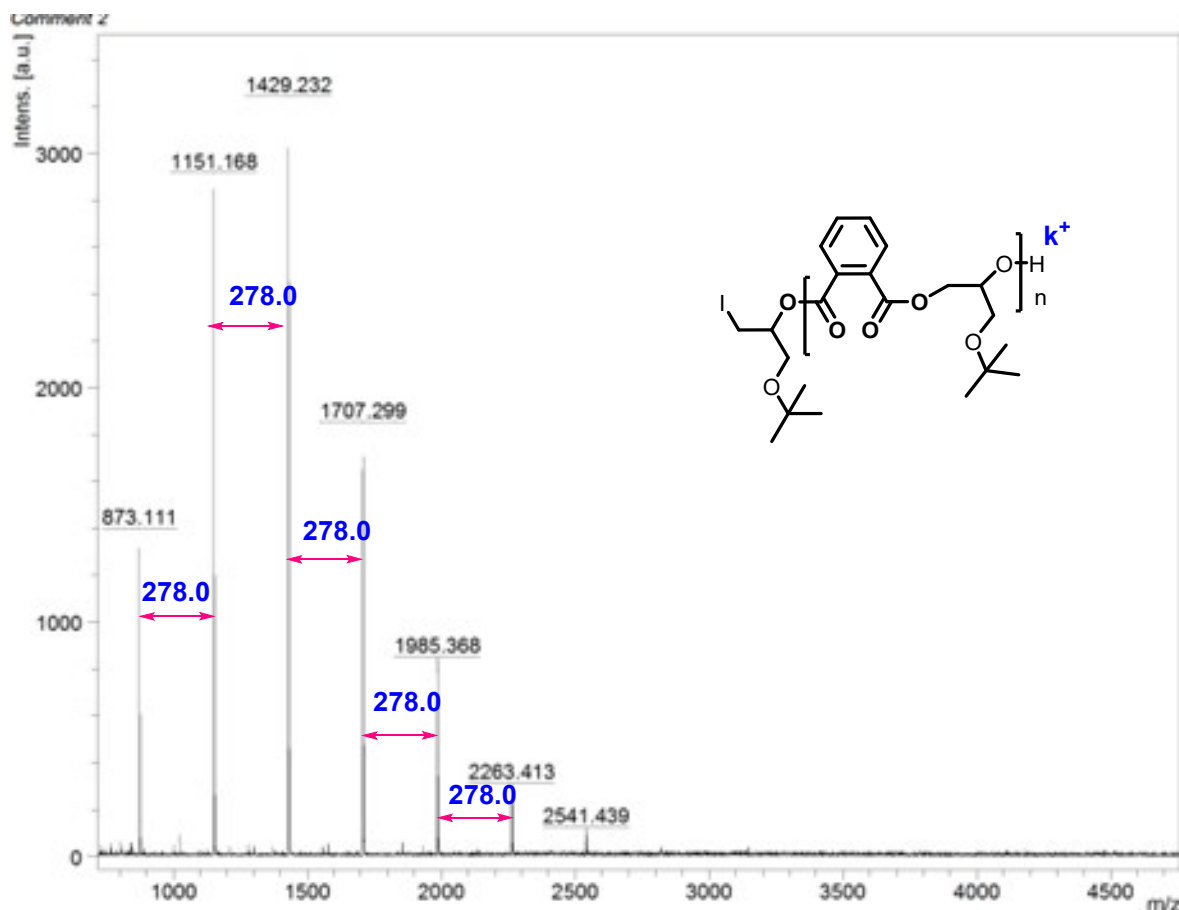

**Figure S46** MALDI-TOF MS spectrum of the short P(PA-*alt*-tBGE) precursor synthesized by the catalysis of  $I_2/tBuOK$ .  $m/z = [126.90 (I) + 130.18 (tBGE) + (278.30 \times n) (PA + tBGE) + 39.09 (K^+) + 1.01 (H^+)]$  ( $n = 2-8$ ). For example: 873.111 (experimental value) and 873.261 ( $n = 2.07$ ; calculated value).

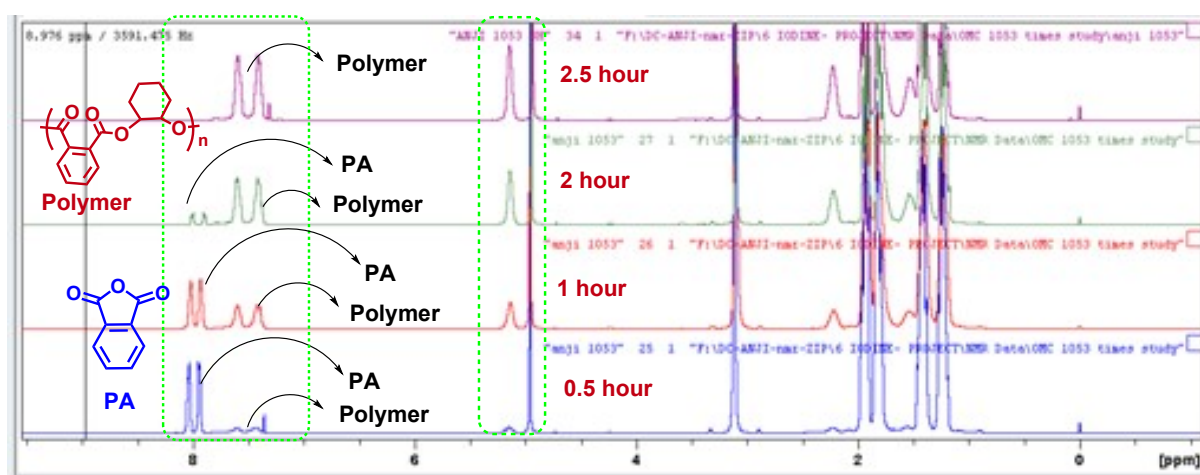

**Figure S47** Overlap of  $^1H$  NMR monitoring of copolymerization PA/CHO and catalysed by  $I_2/tBuOK$  catalyst system with the ratio  $I_2/tBuOK/PA/CHO = 1:1:100:400$  (Entry 3 to 6, Table S1) with respect 0.5 h, 1 h, 2 h, and 2.5 h of reaction time.

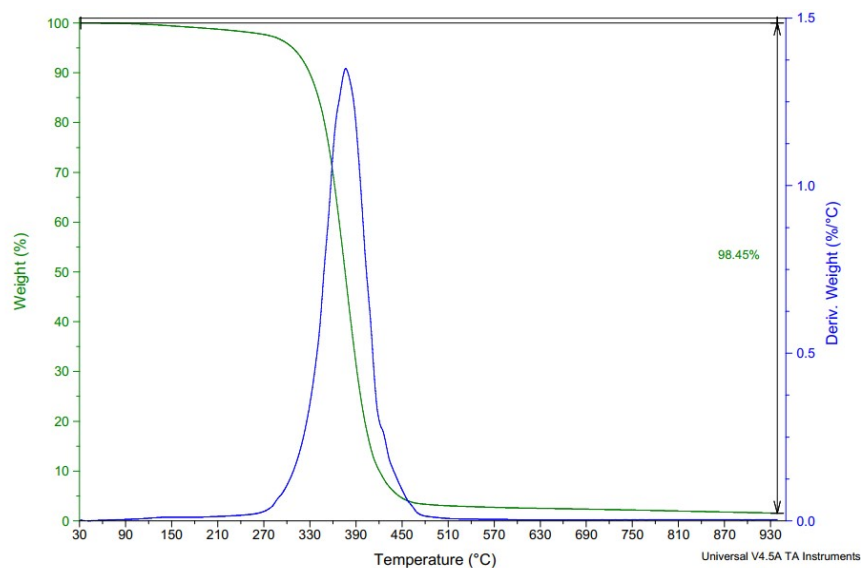

**Figure S48** TGA and derivative thermogravimetry (DTG) curves of P(PA-*alt*-AGE) copolymer derived by the action of I<sub>2</sub>/*t*BuOK (I<sub>2</sub>/*t*BuOK/PA/AGE = 1:1:100:400).

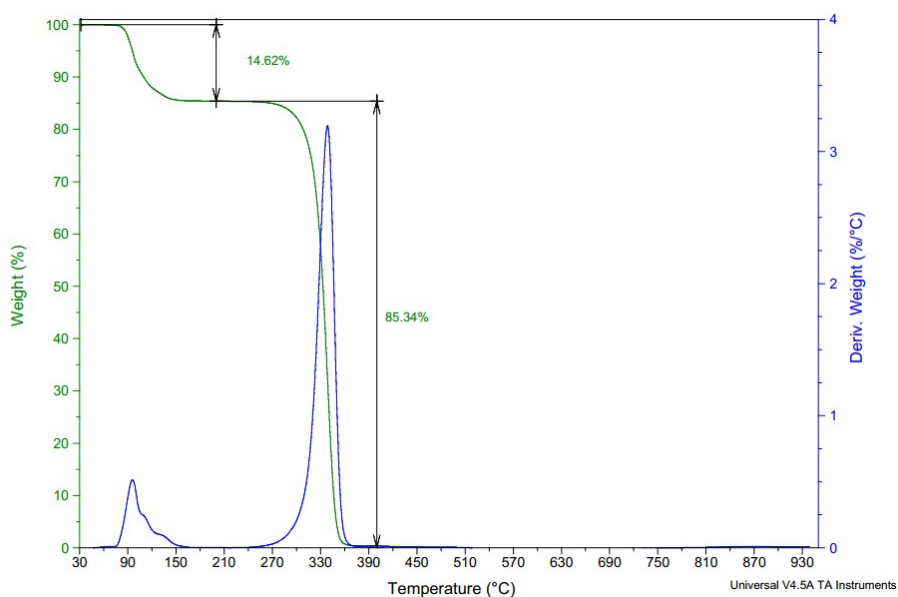

**Figure S49** TGA and derivative thermogravimetry (DTG) curves of P(PA-*alt*-CHO) copolymer derived by the action of I<sub>2</sub>/*t*BuOK (I<sub>2</sub>/*t*BuOK/PA/CHO = 1:1:500:1200).

## References

- 1 Y. Takeda, S. Okumura, S. Tone, I. Sasaki and S. Minakata, *Organic Letters*, 2012, **14**, 4874-4877.
- 2 D. D. Tanner, G. C. Gidley, N. Das, J. E. Rowe and A. Potter, *Journal of the American Chemical Society*, 1984, **106**, 5261-5267.
